# Supplementary material for: Ringiculid bubble snails recovered as the sister group to sea slugs (Nudipleura)
Source: PubMed Central journal article supplement (PMC4976385; doi:10.1038/srep30908), 2016-08-08
Supplement: srep30908-s1.pdf [file srep30908-s1.pdf]

# Ringiculid bubble snails recovered as the sister group to sea slugs (Nudipleura)

Yasunori Kano<sup>1</sup>, Bastian Brenzinger<sup>2,3</sup>, Alexander Nützel<sup>4</sup>, Nerida G. Wilson<sup>5</sup> & Michael Schrödl<sup>2,3</sup>

<sup>1</sup>Department of Marine Ecosystems Dynamics, Atmosphere and Ocean Research Institute, The University of Tokyo, 5-1-5 Kashiwanoha, Kashiwa, Chiba 277-8564, Japan. <sup>2</sup>SNSB-Bavarian State Collection of Zoology, Münchhausenstr. 21, 81247 München, Germany. <sup>3</sup>Department Biology II, BioZentrum, Ludwig-Maximilians-Universität, Großhadernerstr. 2, 82152 Planegg-Martinsried, Germany; <sup>4</sup>SNSB-Bavarian State Collection of Paleontology and Geology, Geobio Center LMU, Richard-Wagner-Str. 10, 80333 München, Germany; <sup>5</sup>Western Australian Museum, Locked Bag 49, Welshpool DC, Perth, WA 6986, Australia. Correspondence and requests for materials should be addressed to Y.K. (email: kano@aori.u-tokyo.ac.jp)

## Supplementary information:

**Table S1.** Nucleotide sequences of primers used for amplification and sequencing

**Table S2.** Gastropod species and sequences used in the phylogenetic reconstruction of euthyneuran clades including Ringiculoidea

**Figure S1.** RAxML trees based on four-gene dataset without one of two major nudipleuran subclades: (a) Nudibranchia (*Bathydoris* and *Felimida*) and (b) Pleurobranchioidea (*Pleurobranchus* and *Tomthompsonia*).

**Figure S2.** Time-calibrated BEAST trees without one of four calibration priors: (a) first split within Euopisthobranchia and (b) splits between *Carychium* and *Smeagol* and (c) between *Ringiculopsis* and three other ringiculids.

**Figure S3.** MrBayes tree based on four-gene dataset.

**Figure S4.** RAxML trees inferred from independent gene fragments: (a) 18S rDNA, (b) 28S rDNA, (c) 16S rDNA and (d) COI.

**Figure S5.** RAxML trees inferred from combined nuclear or mitochondrial gene dataset: (a) nuclear 18S and 28S; (b) mitochondrial 16S and COI.

Kano et al. Table S1. Nucleotide sequences of primers used for amplification and sequencing.

| Locus   | Primer                 | Sequence                   | Direction | Position <sup>*1</sup>              | Reference                          |
|---------|------------------------|----------------------------|-----------|-------------------------------------|------------------------------------|
| 18S     | 18A1                   | CCTACCTGGTTGATCCTGCCAG     | Forward   | -21 to 0                            | Steiner and Dreyer (2003)          |
|         | 188f                   | GGATCTATTGGAGGGCAAGT       | Forward   | 554-573                             | Nakamura et al. (2007)             |
|         | NS2 <sup>*2</sup>      | GGCTGCTGGCACCAGACTTGC      | Reverse   | 568-588                             | White et al. (1990)                |
|         | NS5                    | AACTTAAAGGAATTGACGGAAG     | Forward   | 1168-1189                           | White et al. (1990)                |
|         | 189r                   | TCGGAATTAACCAGACAAATC      | Reverse   | 1335-1355                           | Nakamura et al. (2007)             |
|         | 1800r                  | ATGATCCTTCCGCAGGTTCCACC    | Reverse   | 1957-1978                           | Steiner and Dreyer (2003)          |
| 28S     | LSU5                   | TAGGTCGACCCGCTGAAYTTAAGCA  | Forward   | -33 to -9                           | Littlewood et al. (2000)           |
|         | 900F                   | CCGTCCTGAAACACGGACCAAG     | Forward   | 636-657                             | Lockyer et al. (2003)              |
|         | ECD2S                  | CTTGGTCCGTGTTTCAAGACGG     | Reverse   | 636-657                             | Williams and Ozawa (2006)          |
|         | LSU1600R               | AGCGCCATCCATTTTCAGG        | Reverse   | 1024-1042                           | Williams et al. (2003)             |
| COI-16S | LCO1490                | GGTCAACAAATCATAAAGATATTGG  | Forward   | -24 to 0                            | Folmer et al. (1994)               |
|         | COIf <sup>*2</sup>     | CCTGCAGGAGGAGGAGAYCC       | Forward   | 617-636                             | This study                         |
|         | COIf-A <sup>*2</sup>   | CCTGCTGGTGGAGGTGAYCC       | Forward   | 617-636                             | This study                         |
|         | COIf-B <sup>*2</sup>   | CCTGCTGGTGGTGGAGAYCC       | Forward   | 617-636                             | This study                         |
|         | COIf-G <sup>*2</sup>   | CCAGCTGGWGGGGGTGATCC       | Forward   | 617-636                             | This study                         |
|         | HCO2198                | TAAACTTCAGGGTGACCAAAAAATCA | Reverse   | 659-684                             | Folmer et al. (1994)               |
|         | Opis COI-Fm            | ACTTTTTTTCCTCAACATTTYTT    | Forward   | 1220-1242                           | Modified from Grande et al. (2002) |
|         | COIa-NER               | CATTTAGTGTAGCAATCAGGRTARTC | Reverse   | 1274-1299                           | Kano and Kase (2004)               |
|         | 16Sar-L                | CGCCTGTTTATCAAAAACAT       | Forward   | 2017-2036                           | Palumbi et al. (1991)              |
|         | Opis1-R                | ATTAYGCTACCTTAGCACRGTC     | Reverse   | 2098-2120                           | Grande et al. (2002)               |
| 16Sbr-H | CCGGTCTGAACTCAGATCAYGT | Reverse                    | 2458-2479 | Modified from Palumbi et al. (1991) |                                    |

<sup>\*1</sup>Position of primers on amplified sequences of '*Microglyphis*' sp. (AORI YK#1460; 18S: LC150579) or *Ringicula doliaris* (#901; 28S: LC150580; COI-16S: LC150582)

<sup>\*2</sup>Sequencing primers

## References

- Folmer, O., Black, M., Hoeh, W., Luts, R., Vrijenhoek, R., 1994. DNA primers for amplification of mitochondrial cytochrome c oxidase subunit I from diverse metazoan invertebrates. *Mol. Mar. Biol. Biotechnol.* 3, 294–299.
- Grande, C., Templado, J., Lucas Cervera, J., Zardoya, R. 2004. The complete mitochondrial genome of the nudibranch *Roboastra europaea* (Mollusca: Gastropoda) supports the monophyly of opisthobranchs. *Mol. Biol. Evol.* 21, 303–313.
- Kano, Y., Kase, T. 2004. Genetic exchange between anchialine cave populations by means of larval dispersal: the case of a new gastropod species *Neritilia cavernicola*. *Zool. Scr.* 33, 423–437.
- Littlewood, D.T.J., Curini-Galletti, M., Herniou, A., 2000. The interrelationships of Proseriata (Platyhelminthes: Seriata) tested with molecules and morphology. *Mol. Phylogenet. Evol.* 16, 449–466.
- Lockyer, A.E., Olson, P.D., Østergaard, P., Rollinson, D., Johnston, D.A., Attwood, S.W., Southgate, V.R., Horak, P., Snyder, S.D., Le, T.H., Agatsuma, T., McManus, D.P., Carmichael, A.C., Naem, S., Littlewood, D.T.J., 2003. The phylogeny of the Schistosomatidae based on three genes with emphasis on the interrelationships of *Schistosoma* Weinland, 1858. *Parasitology* 126, 203–224.
- Nakamura, K., Kano, Y., Suzuki, N., Namatame, T., Kosaku, A. 2007. 18S rRNA phylogeny of sea spiders with emphasis on the position of Rhynchothoracidae. *Mar. Biol.*, 153, 213–223.
- Palumbi, S., Martin, A., Romano, S., McMillan, W.O., Stice, L., Grabowski, G., 1991. The Simple Fool's Guide to PCR, Version 2.0. Department of Zoology and Kewalo Marine Laboratory, University of Hawaii, Honolulu.
- Steiner, G., Dreyer, H., 2003. Molecular phylogeny of Scaphopoda (Mollusca) inferred from 18S rRNA sequences—support for a Scaphopoda–Cephalopoda clade. *Zool. Scr.* 32, 343–356.
- White, T.J., Bruns, T., Lee, S., Taylor, J.W., 1990. Amplification and direct sequencing of fungal ribosomal RNA genes for phylogenetics, in: Innis, M.A., Gelfand, D.H., Sninsky, J.J., White, T.J. (Eds.), *PCR Protocols: a Guide to Methods and Applications*. Academic Press, New York, pp. 315–322.
- Williams, S.T., Ozawa, T., 2006. Molecular phylogeny suggests polyphyly of both the turban shells (family Turbinidae) and the superfamily Trochoidea (Mollusca: Vetigastropoda). *Mol. Phylogenet. Evol.* 39, 33–51.
- Williams, S.T., Reid, D.G., Littlewood, D.T.J., 2003. A molecular phylogeny of the Littorininae (Gastropoda: Littorinidae): unequal evolutionary rates, morphological parallelism, and biogeography of the southern ocean. *Mol. Phylogenet. Evol.* 28, 60–86.

Kano et al. Table S2. Gastropod species and sequences used in the phylogenetic reconstruction of euthyneuran clades including Ringiculoidea. DDBJ/EMBL/GenBank accession number and length of sequences are shown along with the voucher of sequenced specimens.

| Clade                | Family              | Species                                | 18S             | length      | 28S             | length          | 16S             | length          | COI             | length                  | Voucher             |
|----------------------|---------------------|----------------------------------------|-----------------|-------------|-----------------|-----------------|-----------------|-----------------|-----------------|-------------------------|---------------------|
| Caenogastropoda      | Cyclophoridae       | <i>Aperostoma palmeri</i>              | DQ093435        | 1791        | DQ279983        | 1951            | DQ093479        | 519             | DQ093523        | 657                     |                     |
|                      | Abyssochrysidae     | <i>Abyssochrysos melanioides</i>       | AB930376        | 1765        | AB930325        | 2127            | AB930403        | 475             | AB930459        | 630                     | AORI YK#1482        |
|                      | Littorinidae        | <i>Littorina littorea</i>              | X91970          | 1831        | AJ488672        | 1443            | DQ093481        | 519             | AJ622946        | 1199                    |                     |
| Orbitestelloidea     | Orbitestellidae     | <i>Orbitestella vera</i>               | FJ917207        | 1793        | FJ917239        | 1032            | FJ917250        | 479             | FJ917268        | 580                     | EED-Phy-518         |
| Rissoelloidea        | Rissoellidae        | <i>Rissoella rissoaformis</i>          | FJ917214        | 1418        | FJ917226        | 3681            | FJ917252        | 403             | FJ917271        | 577                     | EED-Phy-502         |
|                      |                     | <i>Rissoella elongatospira</i>         | FJ917203        | 2175        | FJ917232        | 1106            | –               |                 | FJ917270        | 577                     | EED-Phy-501         |
| Acteonoidea          | Acteonidae          | <i>Pupa solidula</i>                   | AY427516        | 1842        | AY427481        | 1065            | EF489319*       | 429             | DQ238006        | 593                     | *EED-Phy-35         |
|                      |                     | <i>Rictaxis punctocaelatus</i>         | EF489346        | 1387        | FJ917243        | 2536            | EF489318        | 365             | EF489393        | 624                     | EED-Phy-454         |
|                      |                     |                                        |                 |             | /EF489370       | 1071            |                 |                 |                 |                         |                     |
|                      | Hydatinidae         | <i>Hydatina physis</i>                 | AY427515        | 1804        | AY427480        | 1087            | EF489320*       | 420             | DQ991932        | 14153                   | *EED-Phy-37         |
| <b>Ringiculoidea</b> | <b>Ringiculidae</b> | <b><i>Ringicula doliaris</i></b>       | <b>LC150577</b> | <b>1304</b> | <b>LC150580</b> | <b>1014</b>     | <b>LC150582</b> | <b>2457</b>     | <b>LC150582</b> | <b>2457</b>             | <b>AORI YK#901</b>  |
|                      |                     | <b><i>Ringicula sp. cf. pilula</i></b> | –               | –           | –               | <b>LC150583</b> | <b>2462</b>     | <b>LC150583</b> | <b>2462</b>     | <b>AORI YK#1463</b>     |                     |
|                      |                     | <b><i>Ringiculopsis foveolata</i></b>  | <b>LC150578</b> | <b>1315</b> | <b>LC150581</b> | <b>929</b>      | <b>LC150584</b> | <b>2520</b>     | <b>LC150584</b> | <b>2520</b>             | <b>AORI YK#1461</b> |
|                      |                     | <b><i>Microglyphis japonica</i></b>    | –               | –           | –               | <b>LC150587</b> | <b>425</b>      | <b>LC150586</b> | <b>658</b>      | <b>AORI YK#2528</b>     |                     |
|                      |                     | <b><i>Microglyphis sp.</i></b>         | –               | –           | –               | <b>LC150589</b> | <b>441</b>      | <b>LC150588</b> | <b>658</b>      | <b>ZSM Mol 20140700</b> |                     |
|                      |                     | <b><i>'Microglyphis' sp.</i></b>       | <b>LC150579</b> | <b>1956</b> | –               | –               | <b>LC150585</b> | <b>2470</b>     | <b>LC150585</b> | <b>2470</b>             | <b>AORI YK#1460</b> |
|                      |                     | <b><i>Ringiculoides kurilensis</i></b> | –               | –           | –               | –               | <b>LC150591</b> | <b>438</b>      | <b>LC150590</b> | <b>1273</b>             | <b>AORI YK#2531</b> |
|                      |                     |                                        | –               | –           | –               | <b>LC150593</b> | <b>440</b>      | <b>LC150592</b> | <b>658</b>      | <b>ZSM Mol 20130355</b> |                     |
| Nudipleura           | Bathydorididae      | <i>Bathydoris clavigera</i>            | AY165754        | 2064        | AY427444        | 1383            | AF249222        | 445             | AF249808        | 599                     |                     |
|                      | Chromodorididae     | <i>Felimida krohni</i>                 | AJ224774        | 1887        | AY427445        | 1064            | AY345036        | 2647            | AY345036        | 2647                    |                     |
|                      | Pleurobranchidae    | <i>Pleurobranchus peroni</i>           | AY427494        | 2022        | AY427455        | 1120            | EF489331*       | 443             | DQ237993        | 593                     | *EED-Phy-436        |

|                 |                 |                                 |           |      |           |      |           |     |           |       |                  |
|-----------------|-----------------|---------------------------------|-----------|------|-----------|------|-----------|-----|-----------|-------|------------------|
|                 |                 | <i>Tomthompsonia antarctica</i> | AY427492  | 2105 | AY427452  | 1156 | EF489330* | 440 | DQ237992  | 593   | *EED-Phy-435     |
| Umbraculoidea   | Umbraculidae    | <i>Umbraculum umbraculum</i>    | AY165753  | 1843 | FJ917246* | 2375 | EF489322* | 439 | AY345023  | 1360  | *EED-Phy-51      |
|                 |                 | <i>(U. mediterraneum)</i>       |           |      | /AY427457 | 1069 |           |     |           |       |                  |
| Anaspidea       | Akeridae        | <i>Akera bullata</i>            | AY427502  | 1789 | AY427466  | 1047 | AF156127  | 418 | AF156143  | 658   |                  |
|                 | Aplysiidae      | <i>Aplysia californica</i>      | AY039804  | 1802 | AY026366  | 3951 | AF192295  | 422 | AF077759  | 658   |                  |
| Cephalaspidea   | Philinidae      | <i>Philine exigua</i>           | HQ168425  | 1798 | HQ168438  | 1036 | HQ168412  | 420 | HQ168450  | 624   | ZSM Mol 20080752 |
|                 | Scaphandridae   | <i>Scaphander lignarius</i>     | EF489348* | 1788 | KC351544  | 1488 | EF489324* | 441 | DQ974663  | 698   | *EED-Phy-442     |
|                 | Haminoeidae     | <i>Haminoea hydatis</i>         | AY427504  | 1847 | AY427468  | 1037 | EF489323* | 425 | DQ238004  | 593   | *EED-Phy-421     |
| Sacoglossa      | Oxynoidae       | <i>Oxynoe antillarum</i>        | FJ917441  | 1998 | FJ917247* | 2411 | FJ917425  | 487 | FJ917483  | 593   | *EED-Phy-723     |
|                 |                 |                                 |           |      | /FJ917466 | 1085 |           |     |           |       |                  |
|                 | Volvatellidae   | <i>Volvatella viridis</i>       | HQ168426  | 1930 | HQ168439  | 1074 | HQ168413  | 435 | HQ168451  | 657   | AORI YK#890      |
|                 | Caliphyllidae   | <i>Cyerce nigricans</i>         | AY427500  | 1847 | AY427463  | 1063 | EU140843  | 441 | DQ237995  | 593   |                  |
|                 | Plakobranhidae  | <i>Thuridilla bayeri</i>        | AF249220  | 1847 | AY427461  | 1058 | DQ480206  | 434 | DQ471271  | 618   |                  |
| Siphonarioidea  | Siphonariidae   | <i>Siphonaria pectinata</i>     | HQ659934  | 1785 | DQ256744  | 2931 | AY377627  | 438 | AF120638  | 669   |                  |
| Glacidorboidea  | Glacidorbidae   | <i>Glacidorbis rusticus</i>     | FJ917211  | 1879 | FJ917227  | 3493 | FJ917264  | 454 | FJ917284  | 577   | EED-Phy-881      |
| Pyramidelloidea | Pyramidellidae  | <i>Turbonilla</i> sp.           | EF489351  | 1838 | EF489376  | 1004 | EF489332  | 473 | EF489396  | 621   | EED-Phy-526      |
| Amphiboloidea   | Phallomedusidae | <i>Phallomedusa solida</i>      | DQ093440  | 1816 | DQ279991  | 2081 | DQ093484  | 442 | DQ093528  | 654   |                  |
| Hygrophila      | Physidae        | <i>Physella acuta</i>           | AY282600  | 1708 | EF489368* | 1011 | AY651241  | 494 | JQ390525  | 14490 | *SMF 325459      |
|                 | Planorbinae     | <i>Ancylus fluviatilis</i>      | AY282593  | 1707 | EF489365* | 1042 | EF489312* | 427 | AY282582  | 959   | *SMF 325462      |
| Acochlidia      | Parhedylidae    | <i>Microhedyle glandulifera</i> | HQ168437  | 1796 | HQ168449  | 1046 | HQ168424  | 441 | HQ168461  | 655   | ZSM Mol 20081019 |
|                 | Pseudunelidae   | <i>Pseudunela marteli</i>       | HQ168431  | 1795 | HQ168444  | 1032 | HQ168418  | 438 | HQ168456  | 655   | ZSM Mol 20080393 |
| Eupulmonata     | Discidae        | <i>Discus rotundatus</i>        | FJ917212  | 1854 | FJ917240  | 1052 | FJ917265  | 425 | FJ917285  | 577   | EED-Phy-607      |
|                 | Onchidiidae     | <i>Onchidium verruculatum</i>   | Y427522   | 1791 | AY427487  | 1050 | EF489316* | 486 | EF489391* | 626   | *EED-Phy-38      |
|                 |                 | <i>Onchidella floridana</i>     | AY427521  | 1790 | AY427486  | 1049 | EF489317* | 492 | EF489392* | 619   | *EED-Phy-462     |
|                 | Ellobiidae      | <i>Smeagol phillipensis</i>     | FJ917210  | 1840 | FJ917229  | 3399 | FJ917263  | 425 | FJ917283  | 577   | EED-Phy-878      |
|                 |                 | <i>Carychium minimum</i>        | EF489341  | 1739 | EF489361  | 1061 | EF489308  | 465 | EF489386  | 663   |                  |

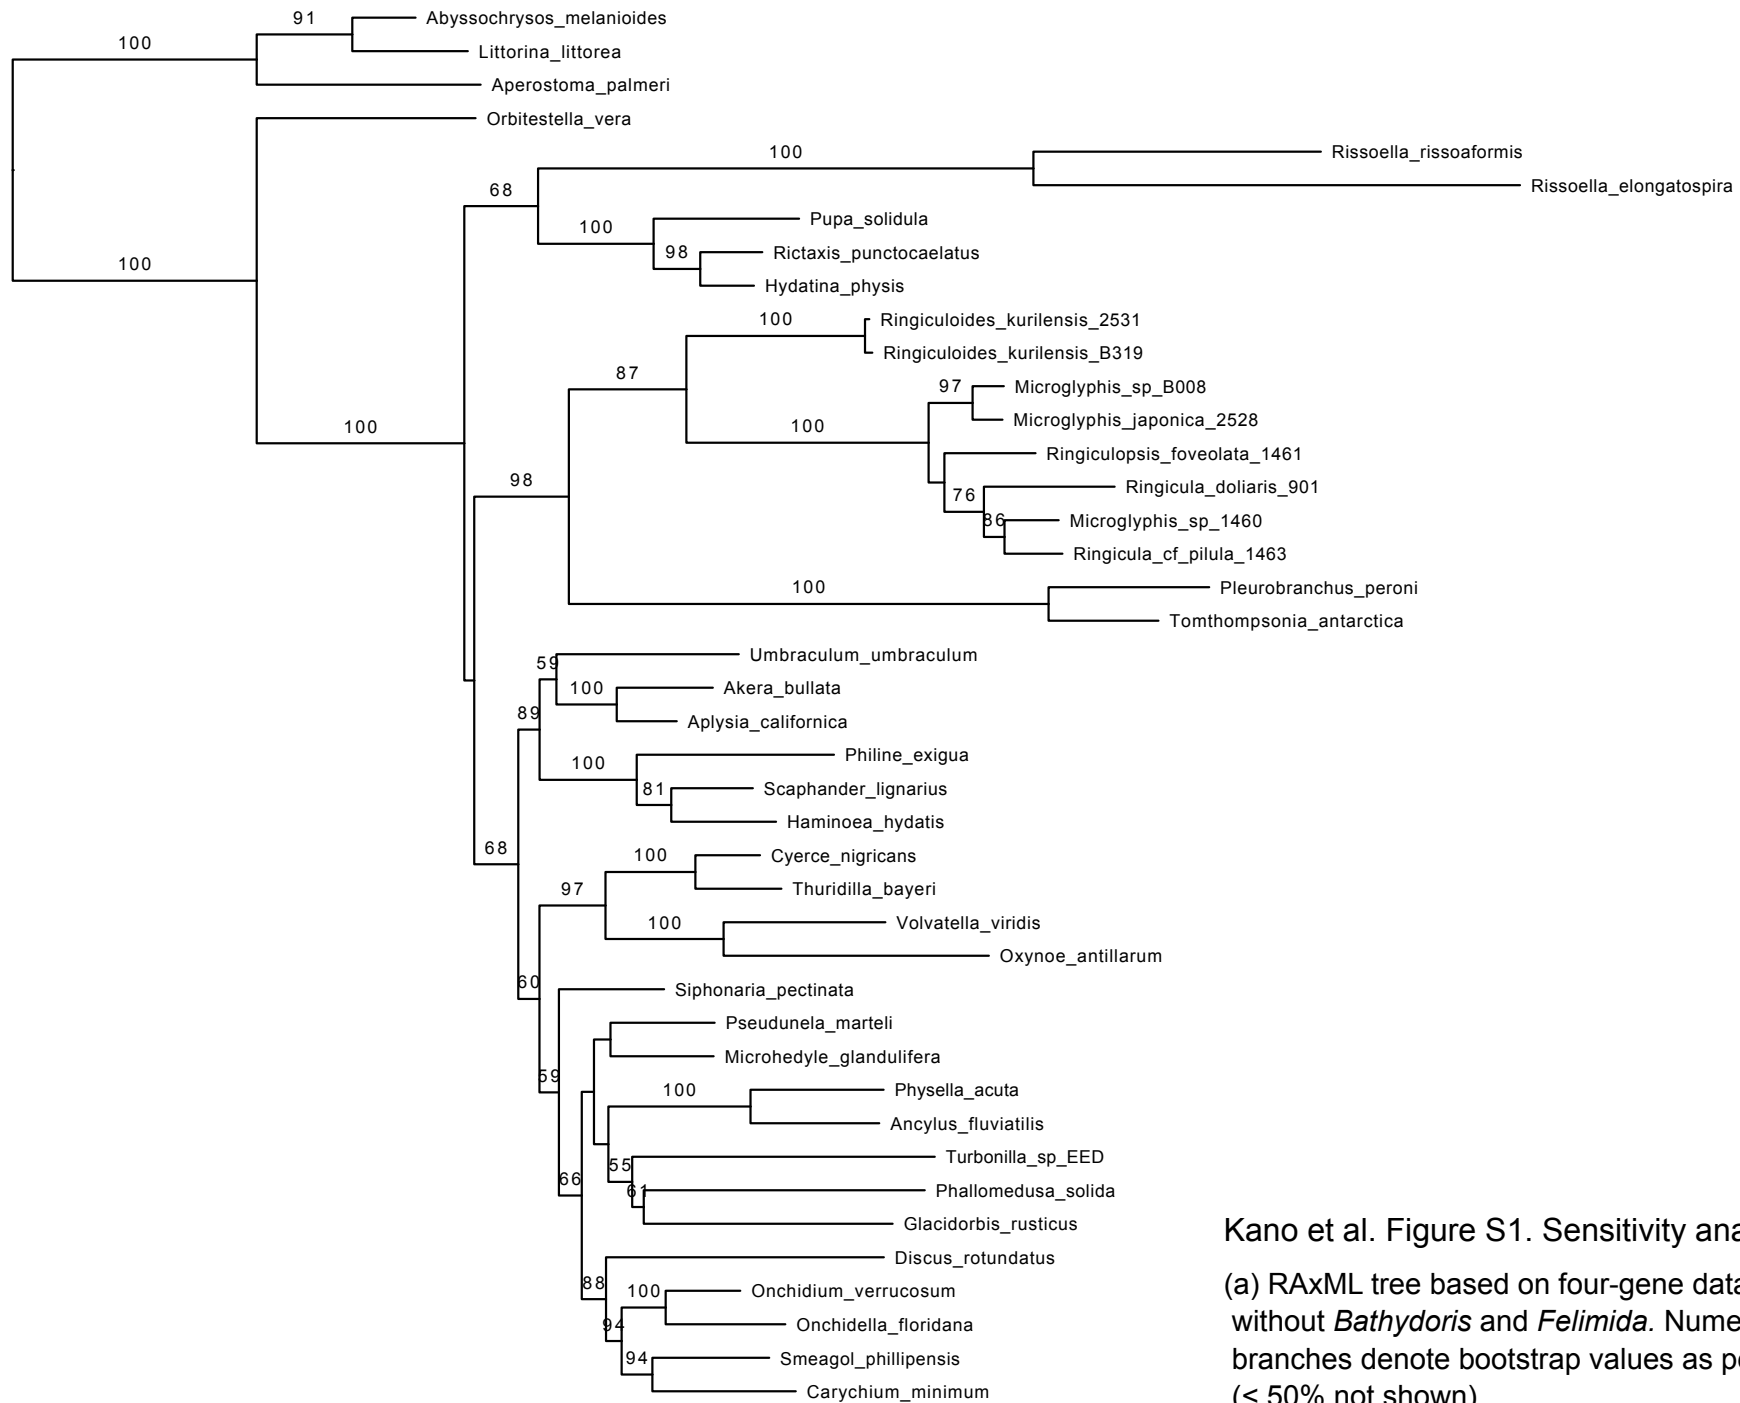

Kano et al. Figure S1. Sensitivity analysis.

(a) RAxML tree based on four-gene dataset without *Bathydoris* and *Felimida*. Numerals on branches denote bootstrap values as percentages (< 50% not shown).

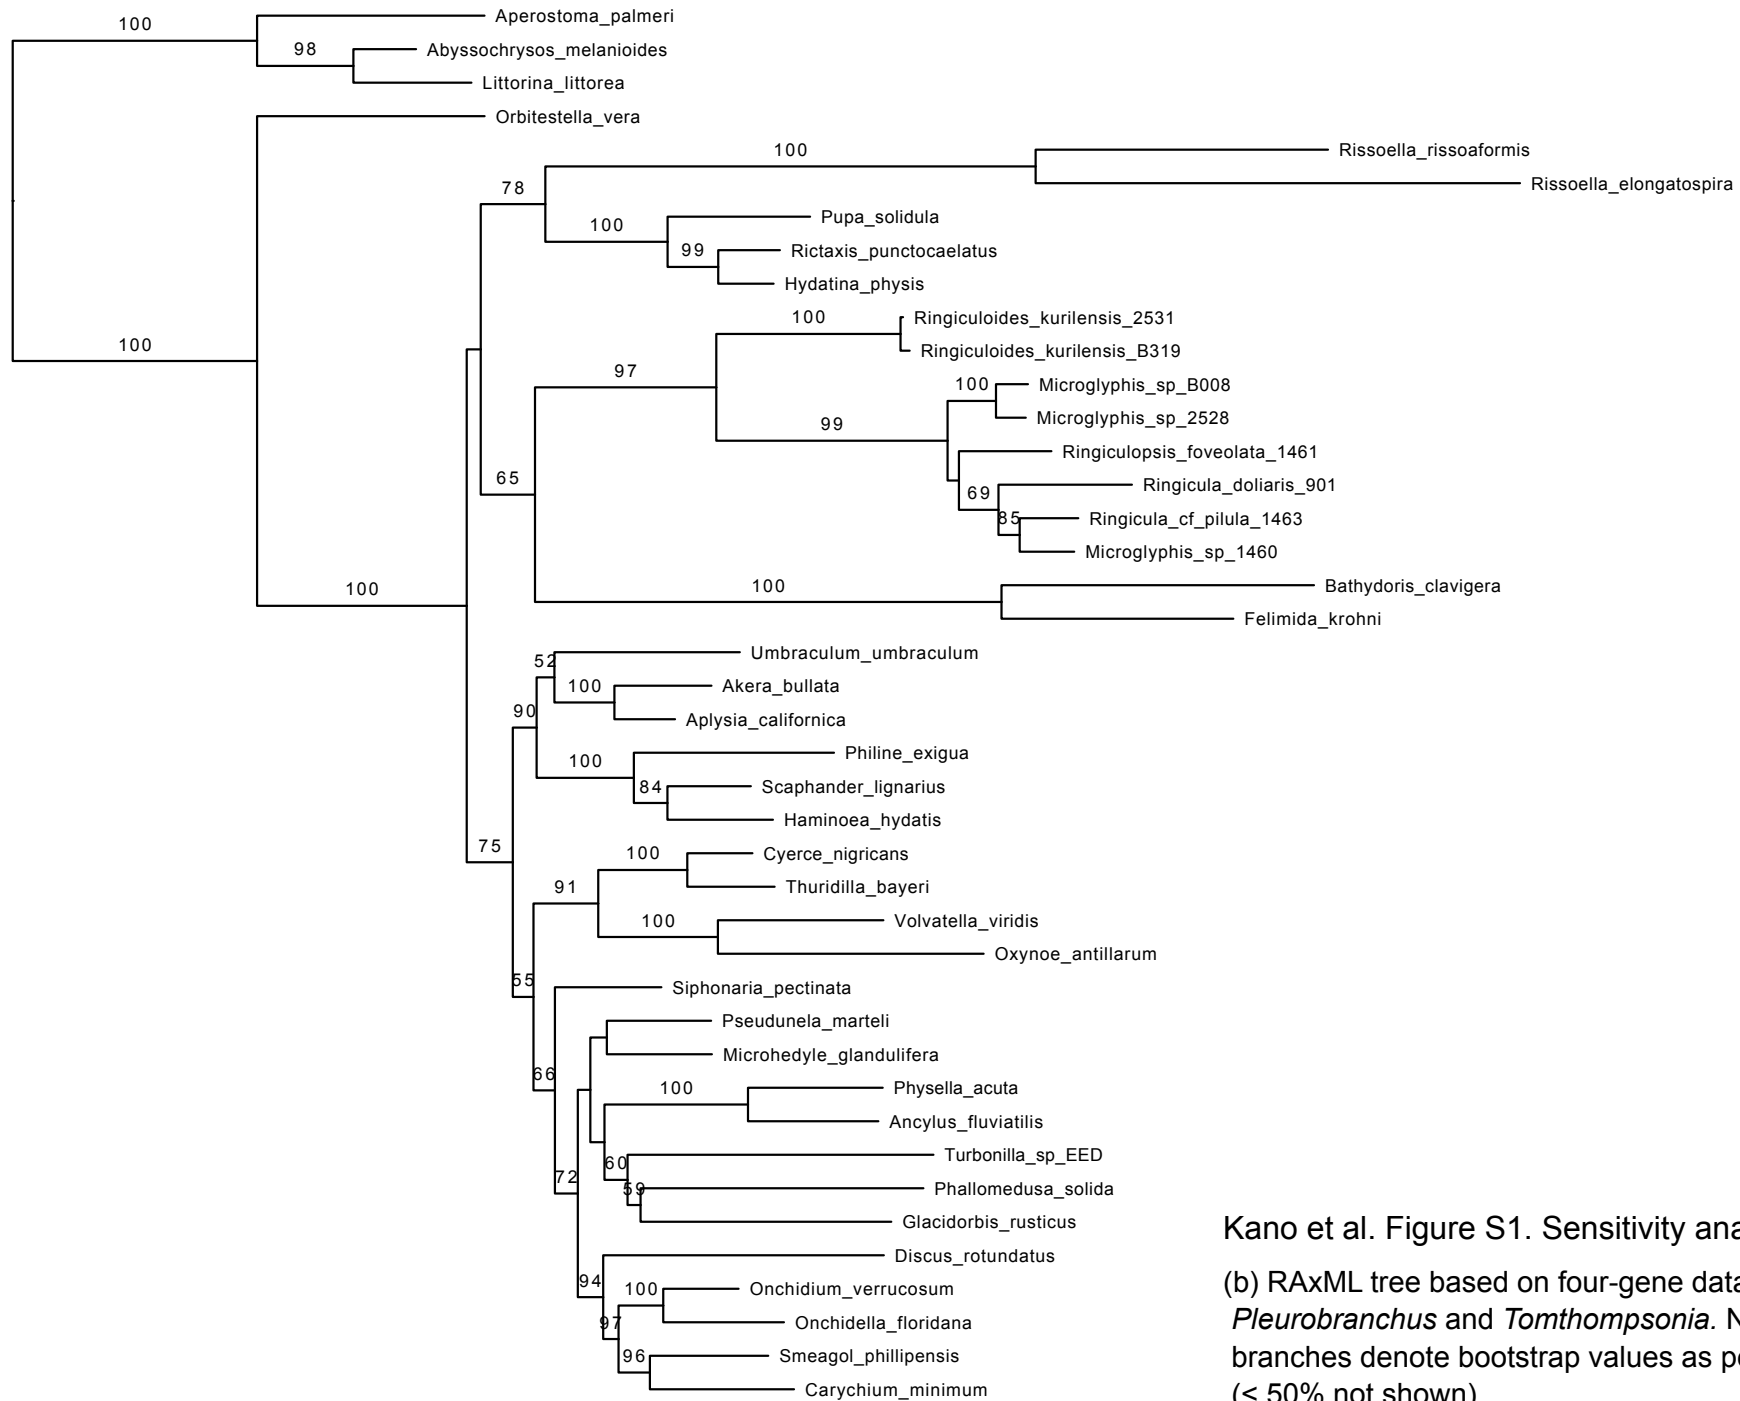

Kano et al. Figure S1. Sensitivity analysis.

(b) RAxML tree based on four-gene dataset without *Pleurobranchus* and *Tomthompsonia*. Numerals on branches denote bootstrap values as percentages (< 50% not shown).

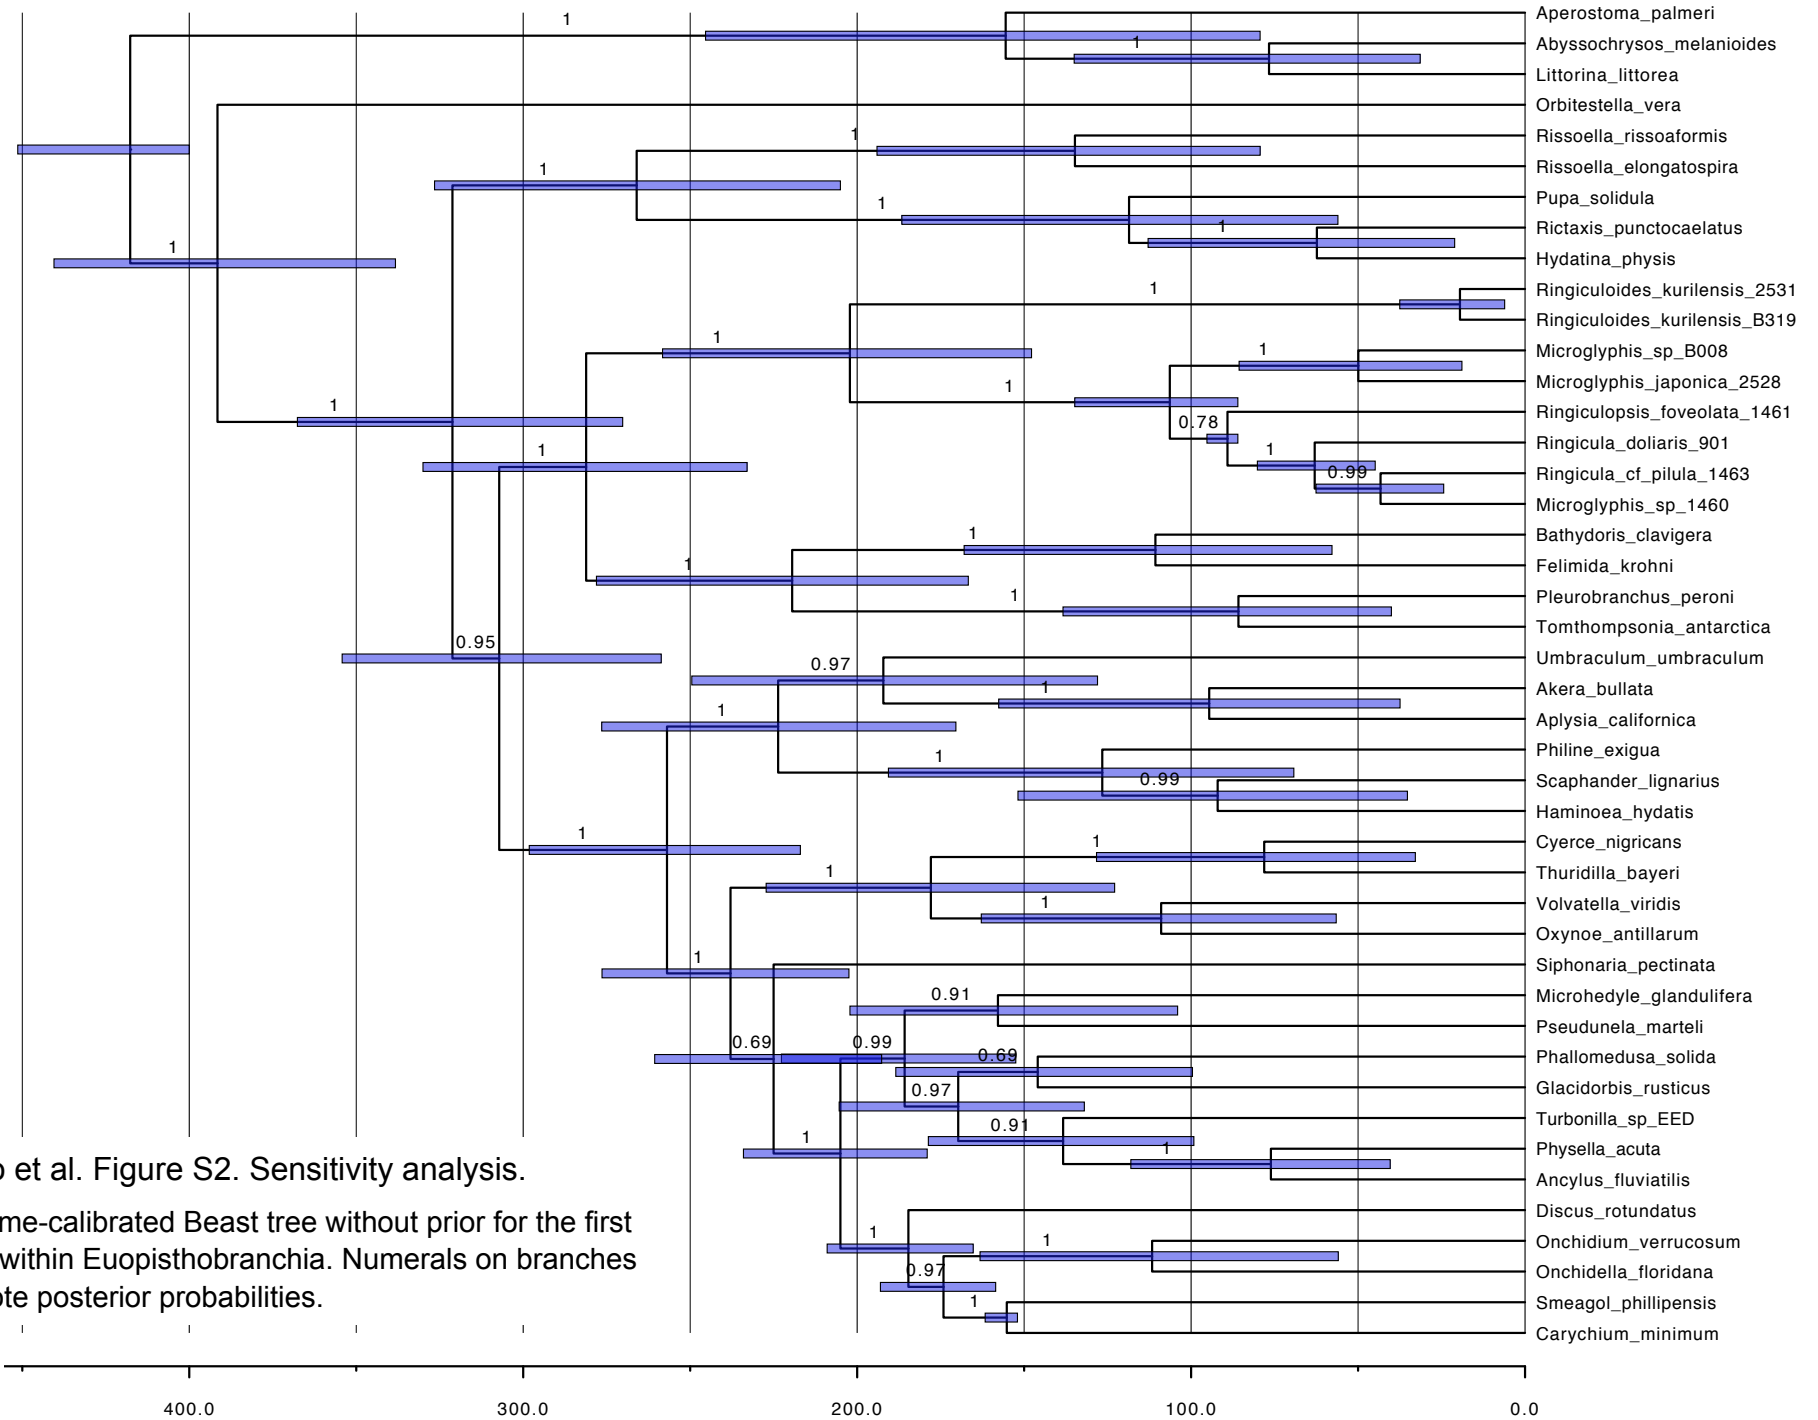

Kano et al. Figure S2. Sensitivity analysis.

(a) Time-calibrated Beast tree without prior for the first split within Euopisthobranchia. Numerals on branches denote posterior probabilities.



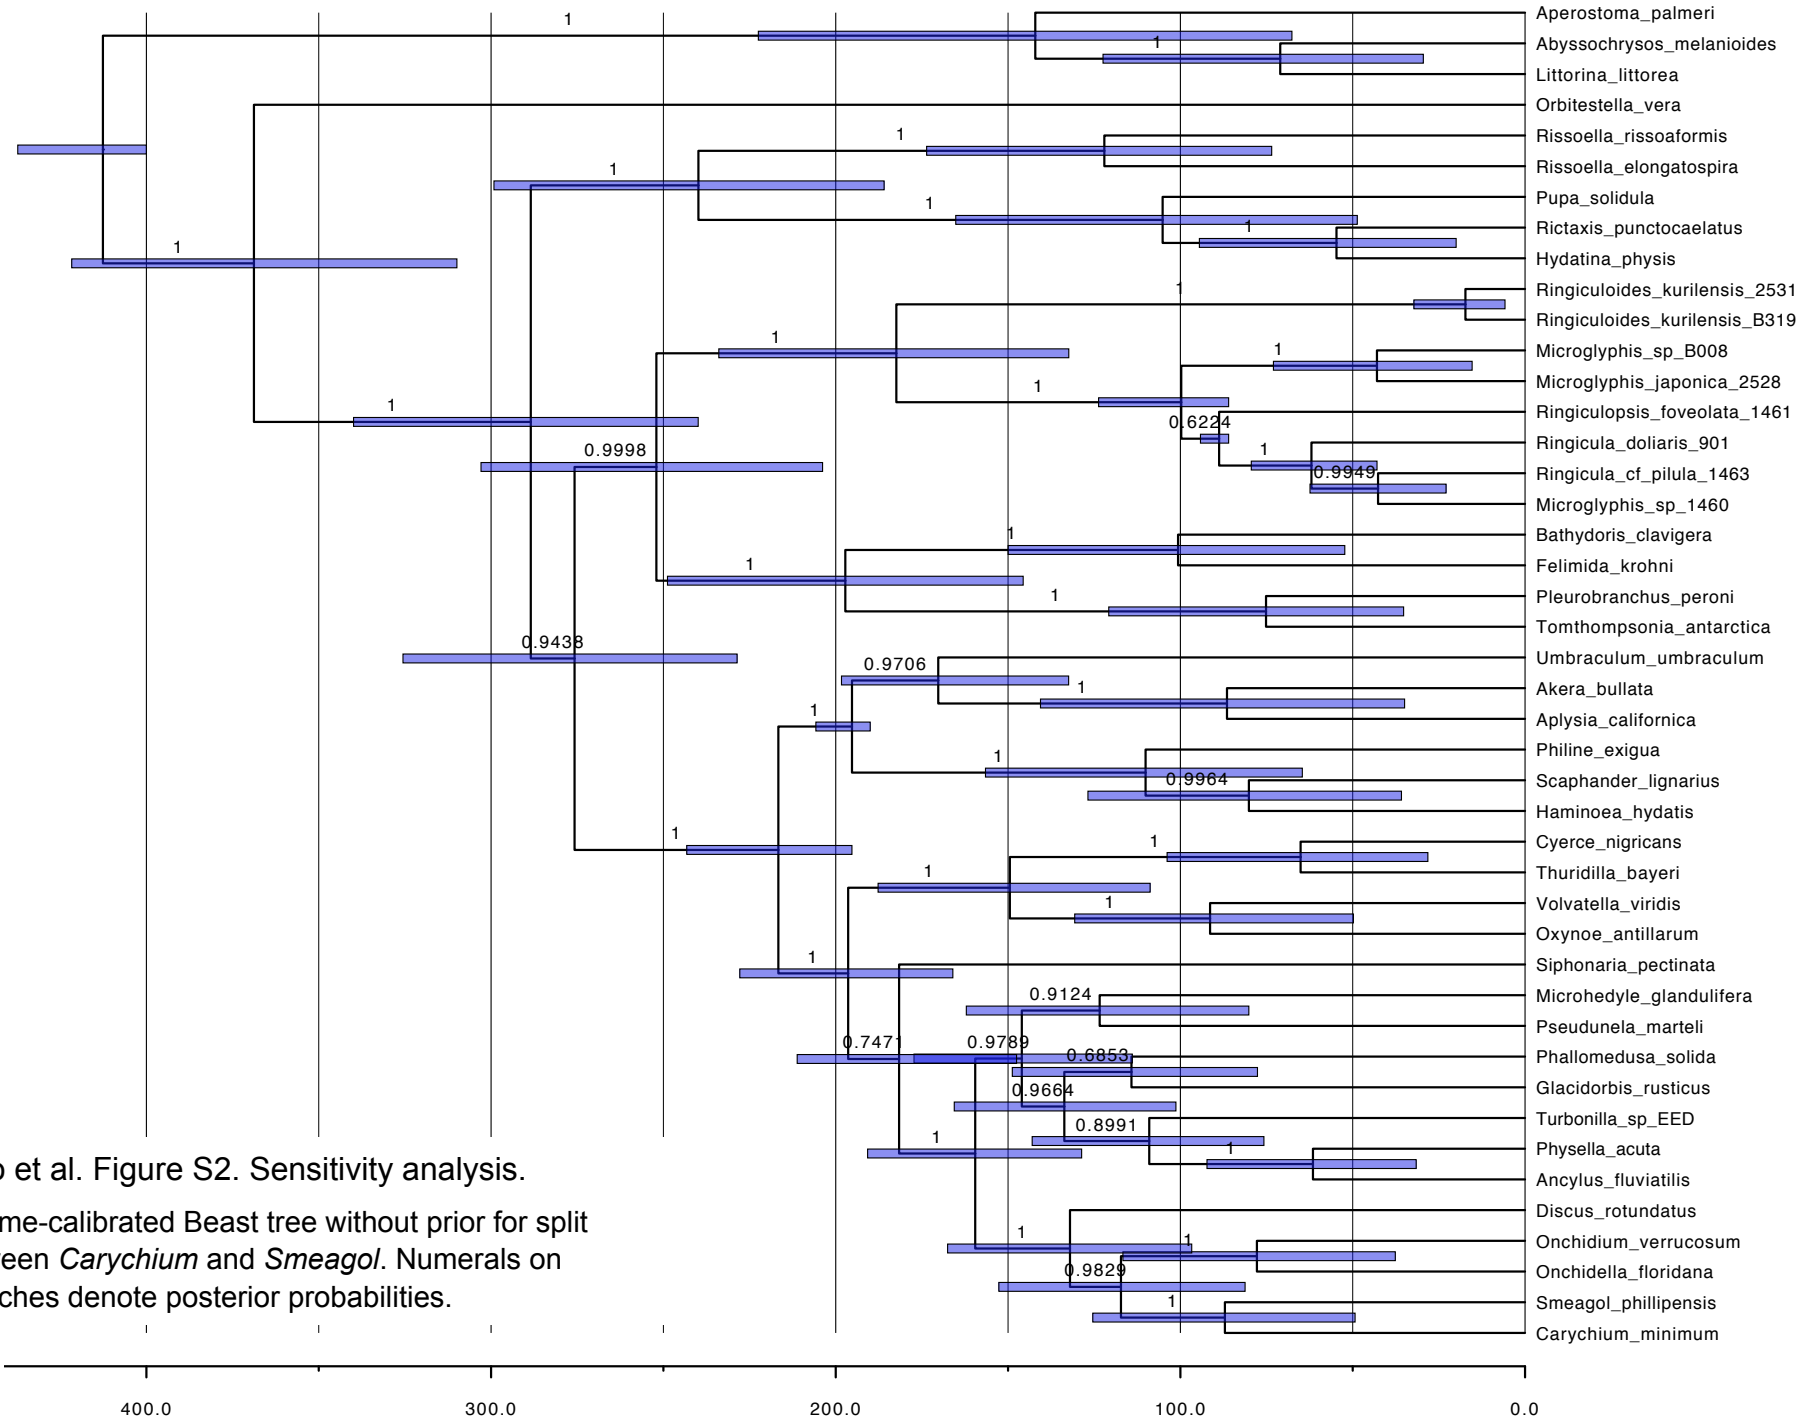

Kano et al. Figure S2. Sensitivity analysis.

(b) Time-calibrated Beast tree without prior for split between *Carychium* and *Smeagol*. Numerals on branches denote posterior probabilities.

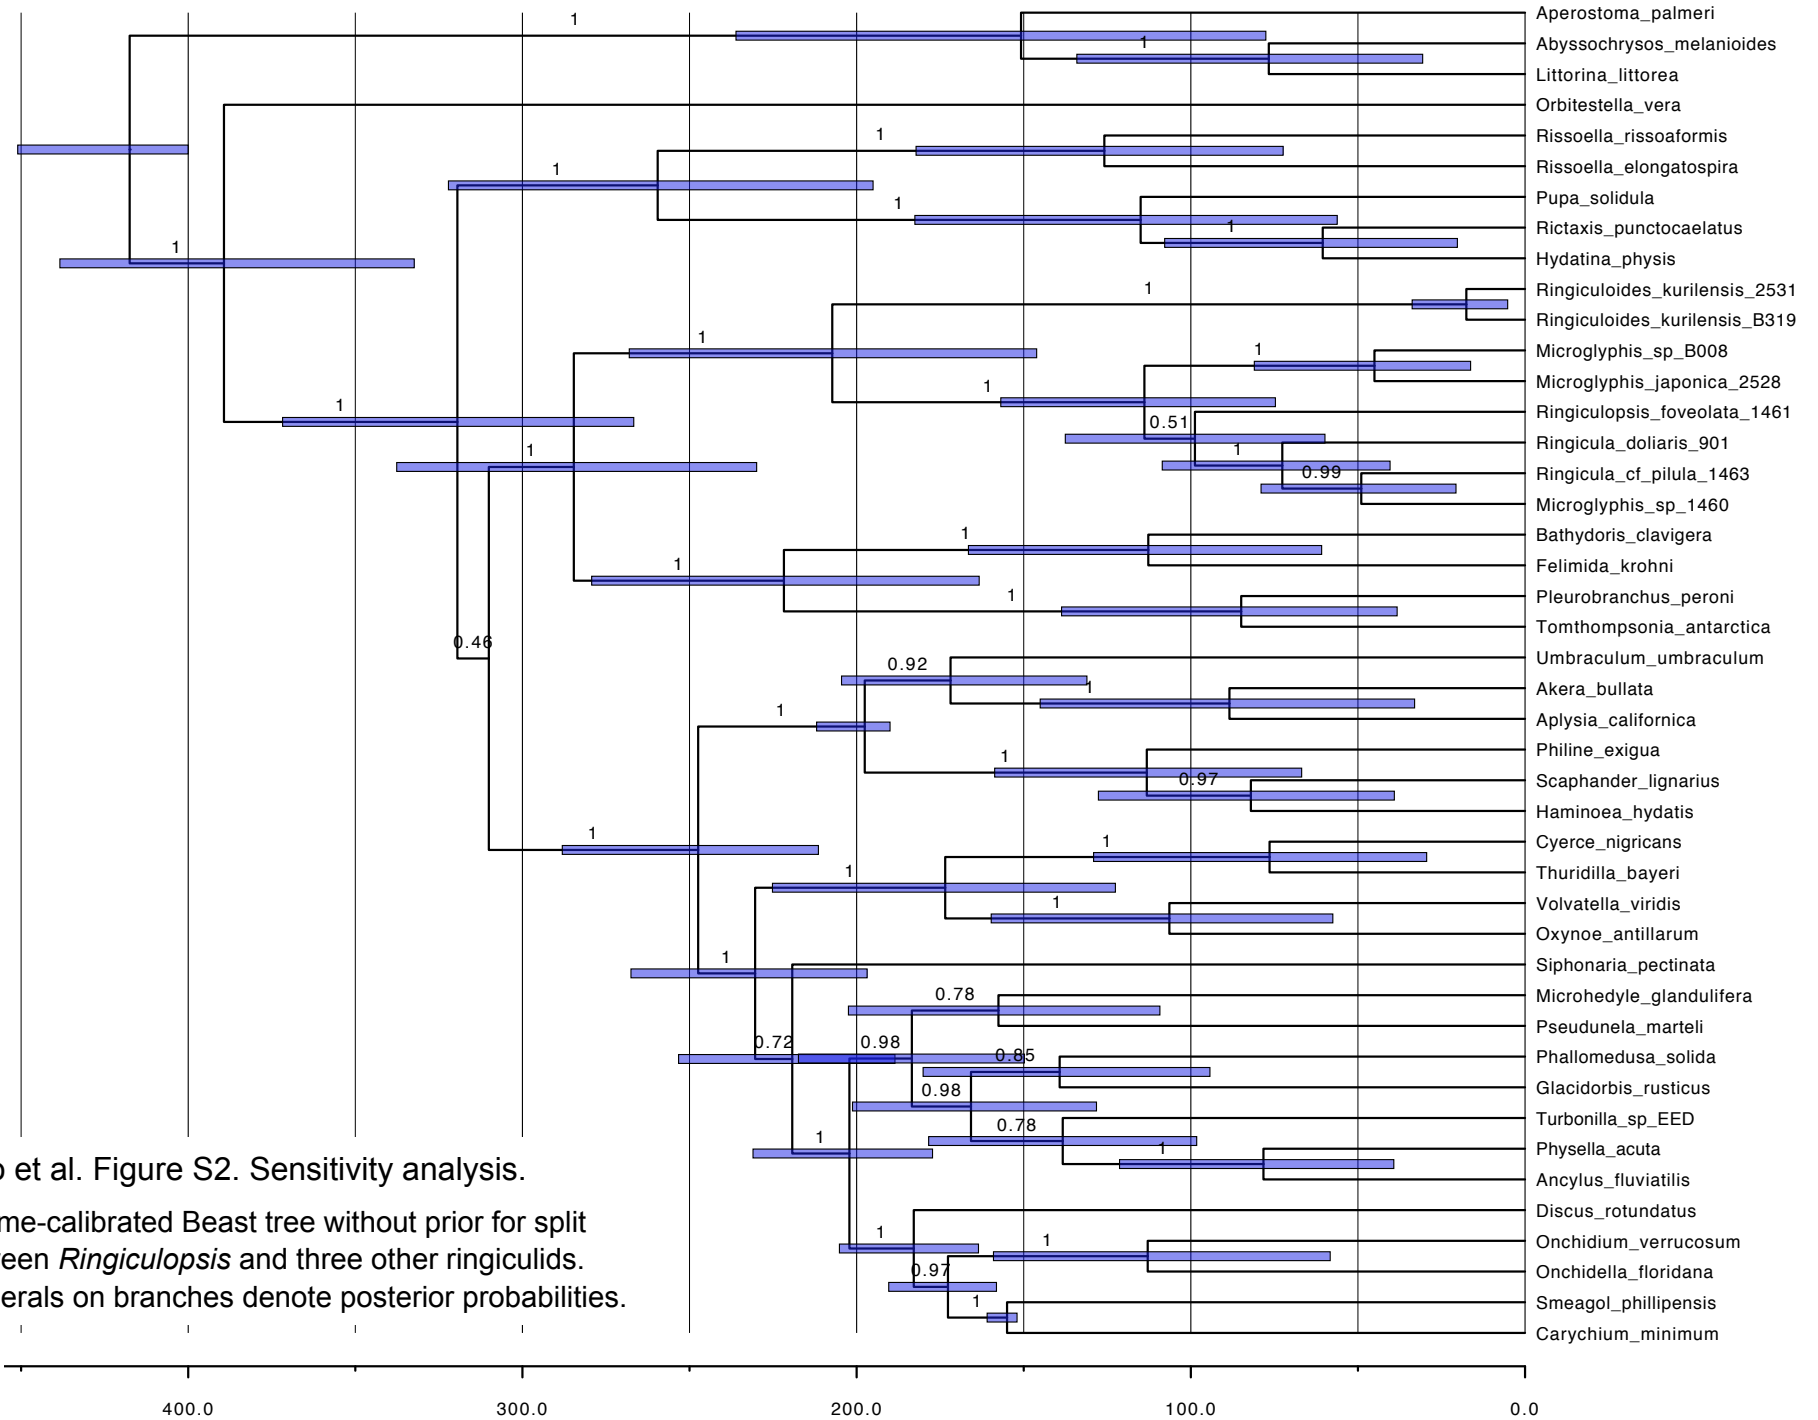

Kano et al. Figure S2. Sensitivity analysis.

(c) Time-calibrated Beast tree without prior for split between *Ringiculopsis* and three other ringiculids. Numerals on branches denote posterior probabilities.

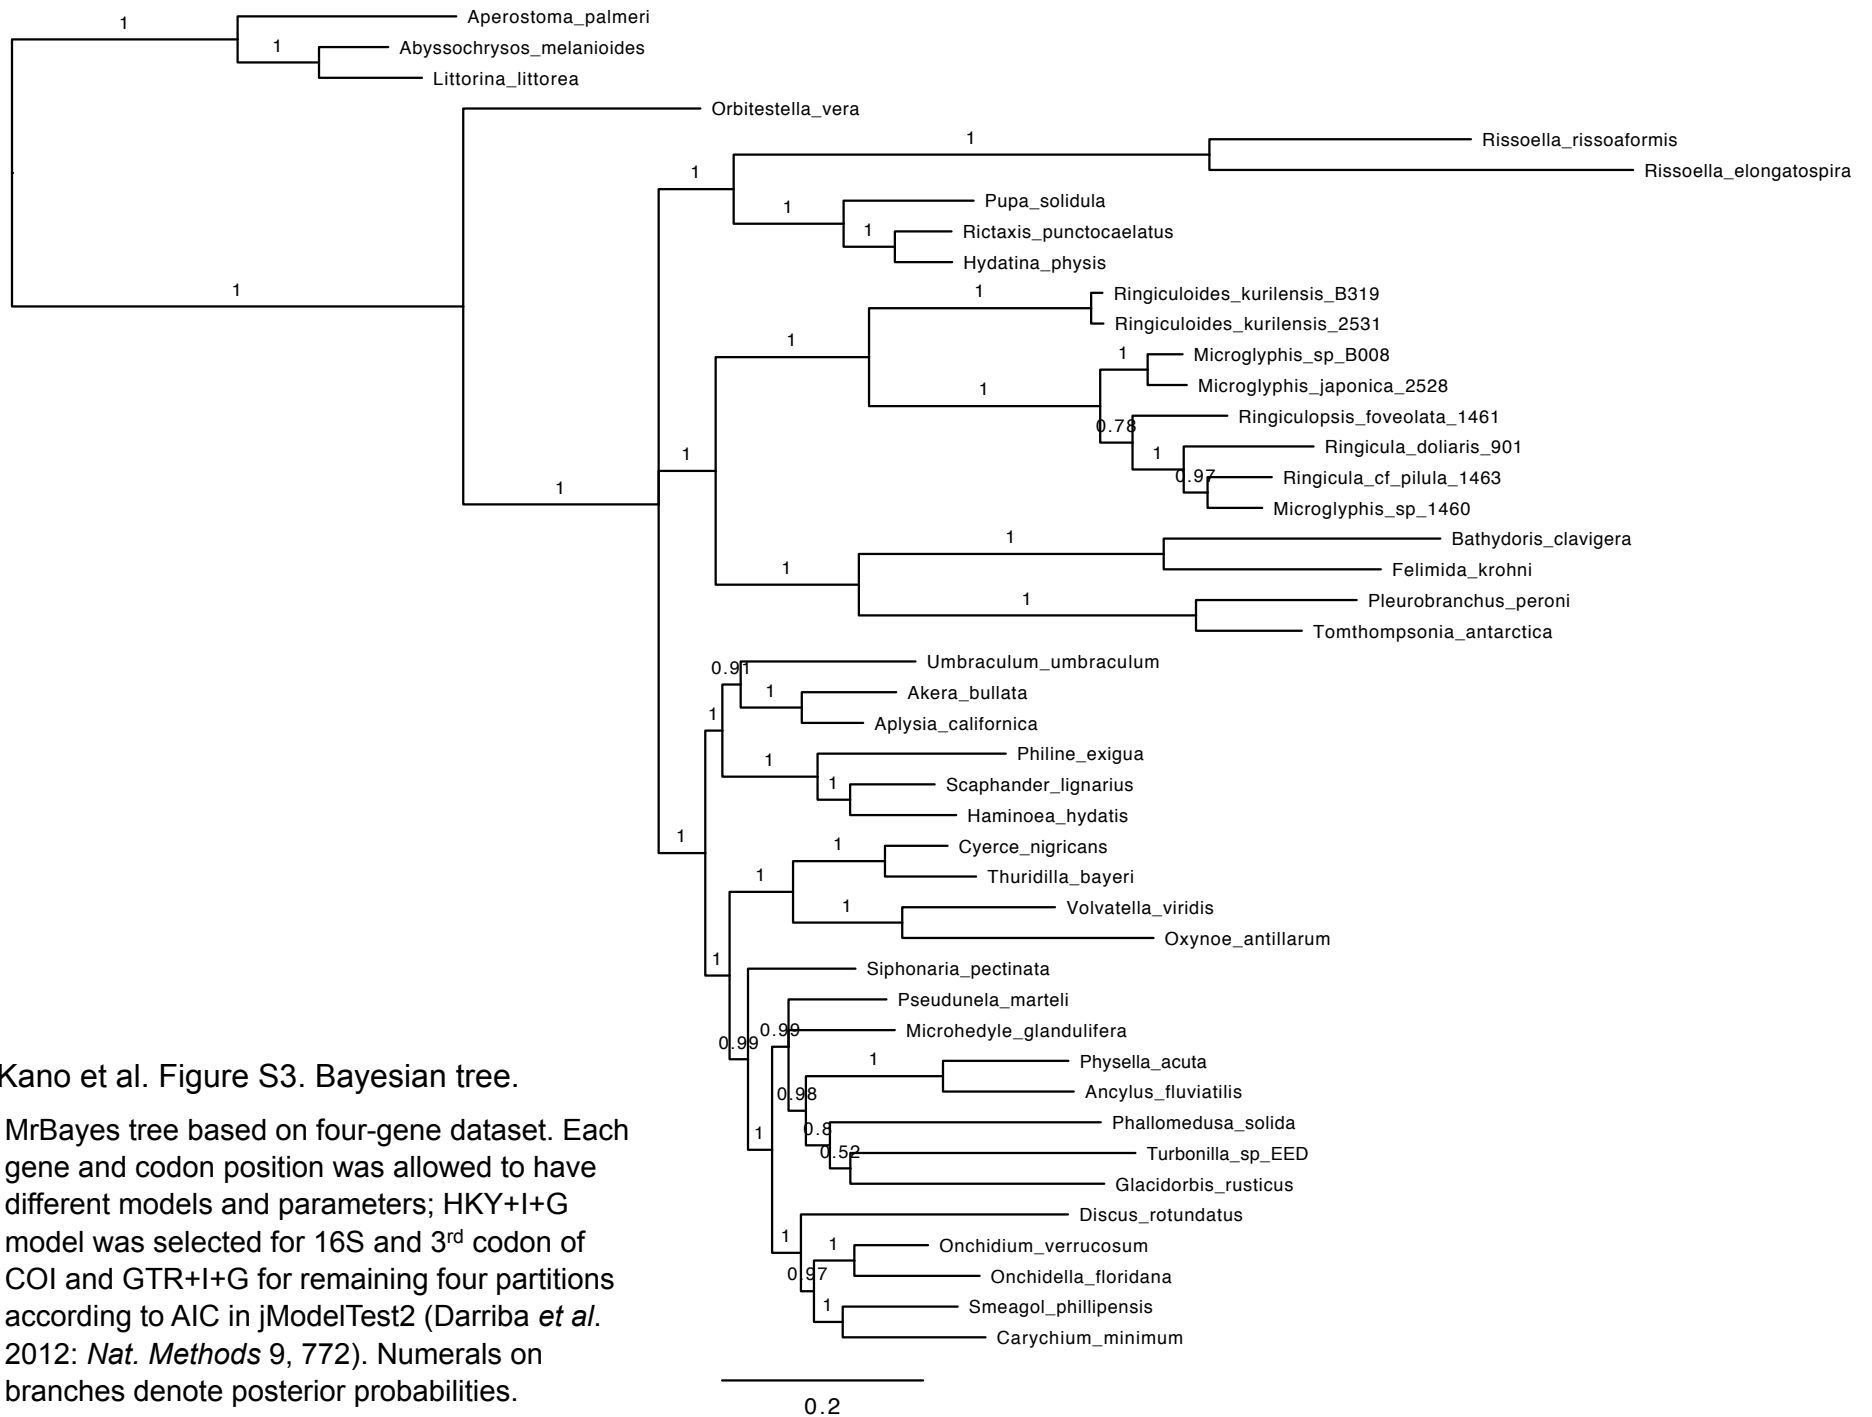

Kano et al. Figure S3. Bayesian tree.

MrBayes tree based on four-gene dataset. Each gene and codon position was allowed to have different models and parameters; HKY+I+G model was selected for 16S and 3<sup>rd</sup> codon of COI and GTR+I+G for remaining four partitions according to AIC in jModelTest2 (Darriba *et al.* 2012: *Nat. Methods* 9, 772). Numerals on branches denote posterior probabilities.

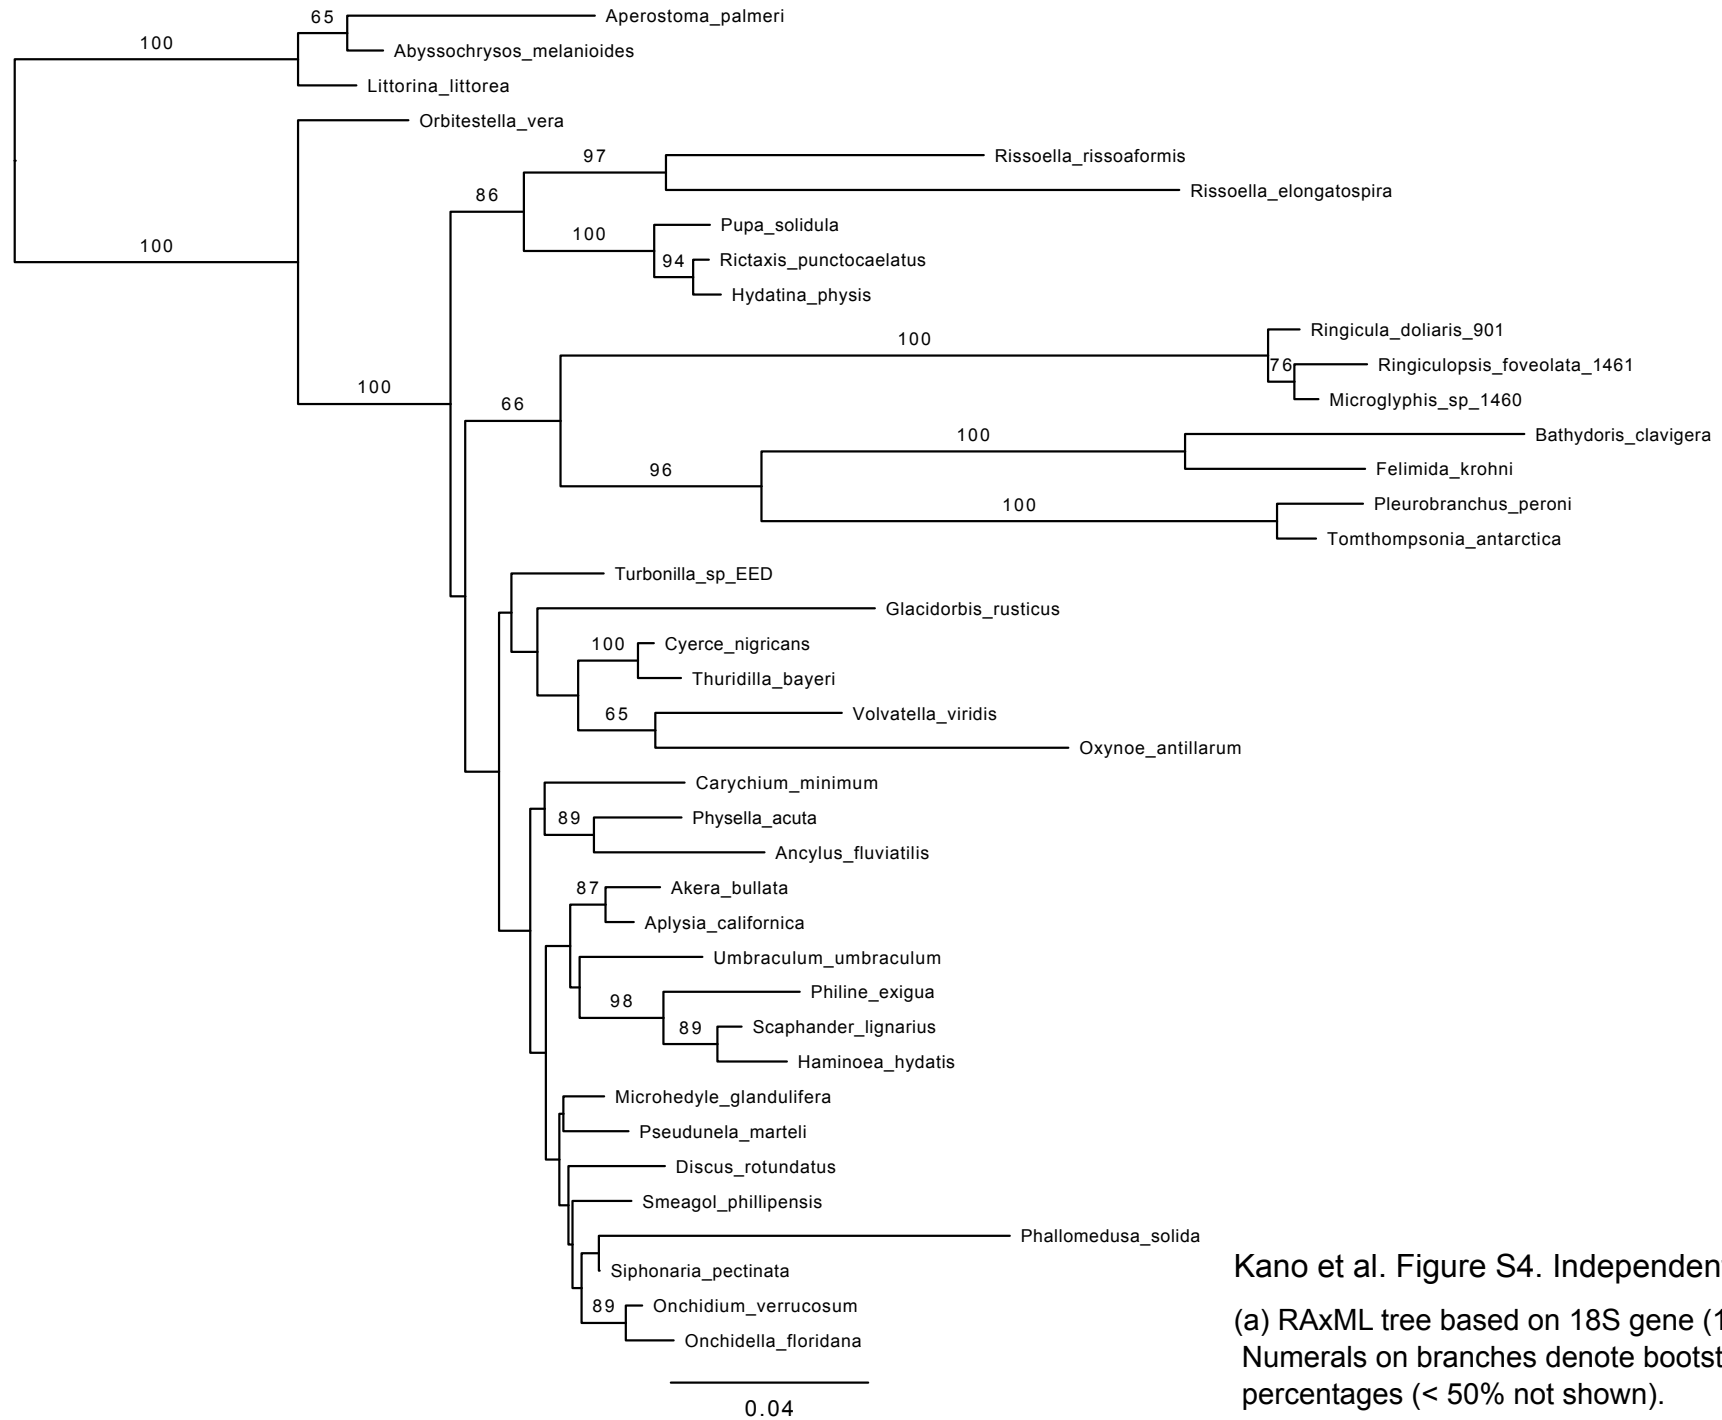

Kano et al. Figure S4. Independent gene trees.  
 (a) RAxML tree based on 18S gene (1,707 sites).  
 Numerals on branches denote bootstrap values as percentages (< 50% not shown).

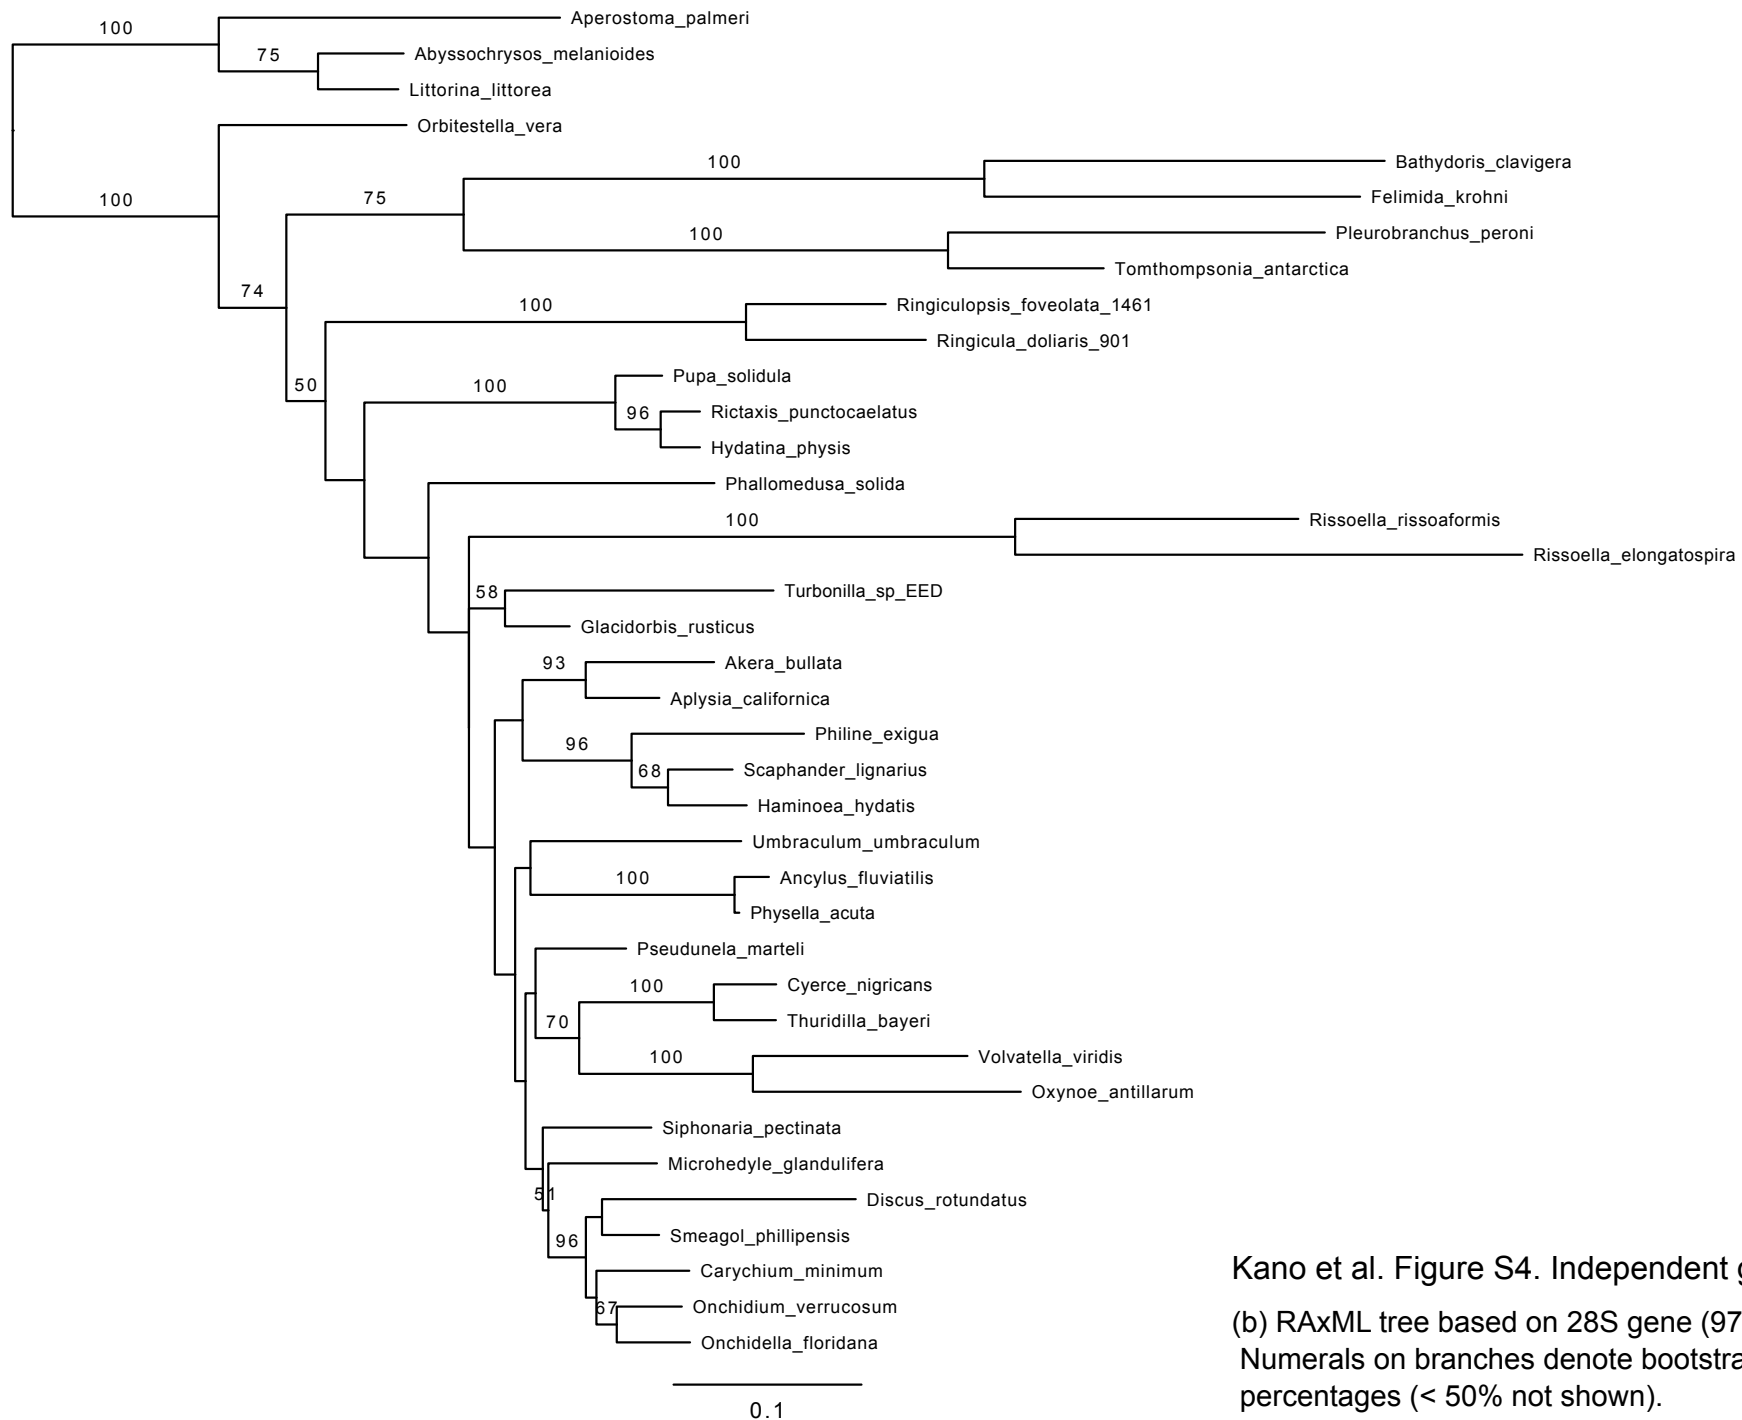

Kano et al. Figure S4. Independent gene trees.  
 (b) RAxML tree based on 28S gene (973 sites).  
 Numerals on branches denote bootstrap values as percentages (< 50% not shown).

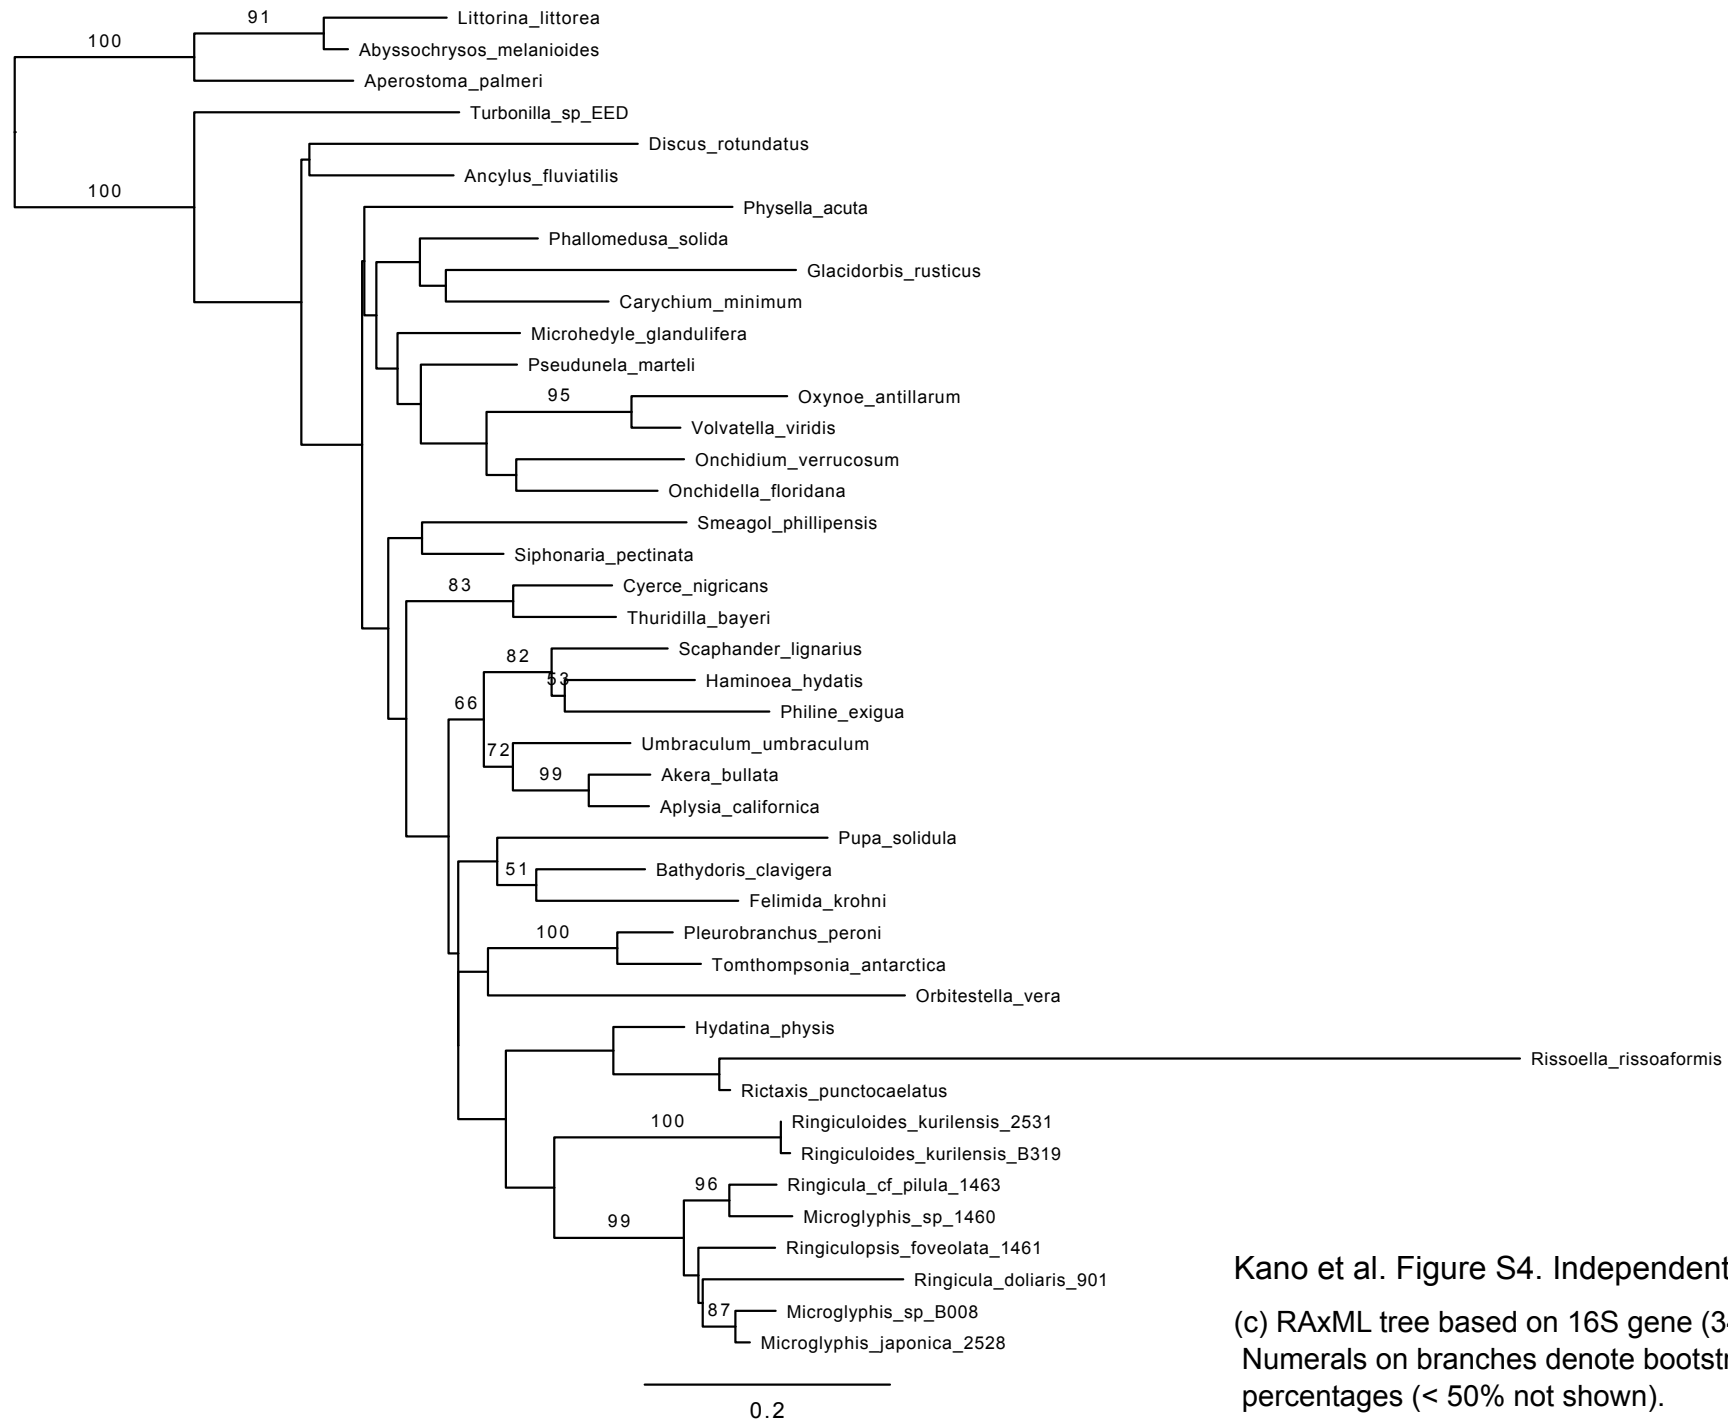

Kano et al. Figure S4. Independent gene trees.  
 (c) RAxML tree based on 16S gene (342 sites).  
 Numerals on branches denote bootstrap values as percentages (< 50% not shown).

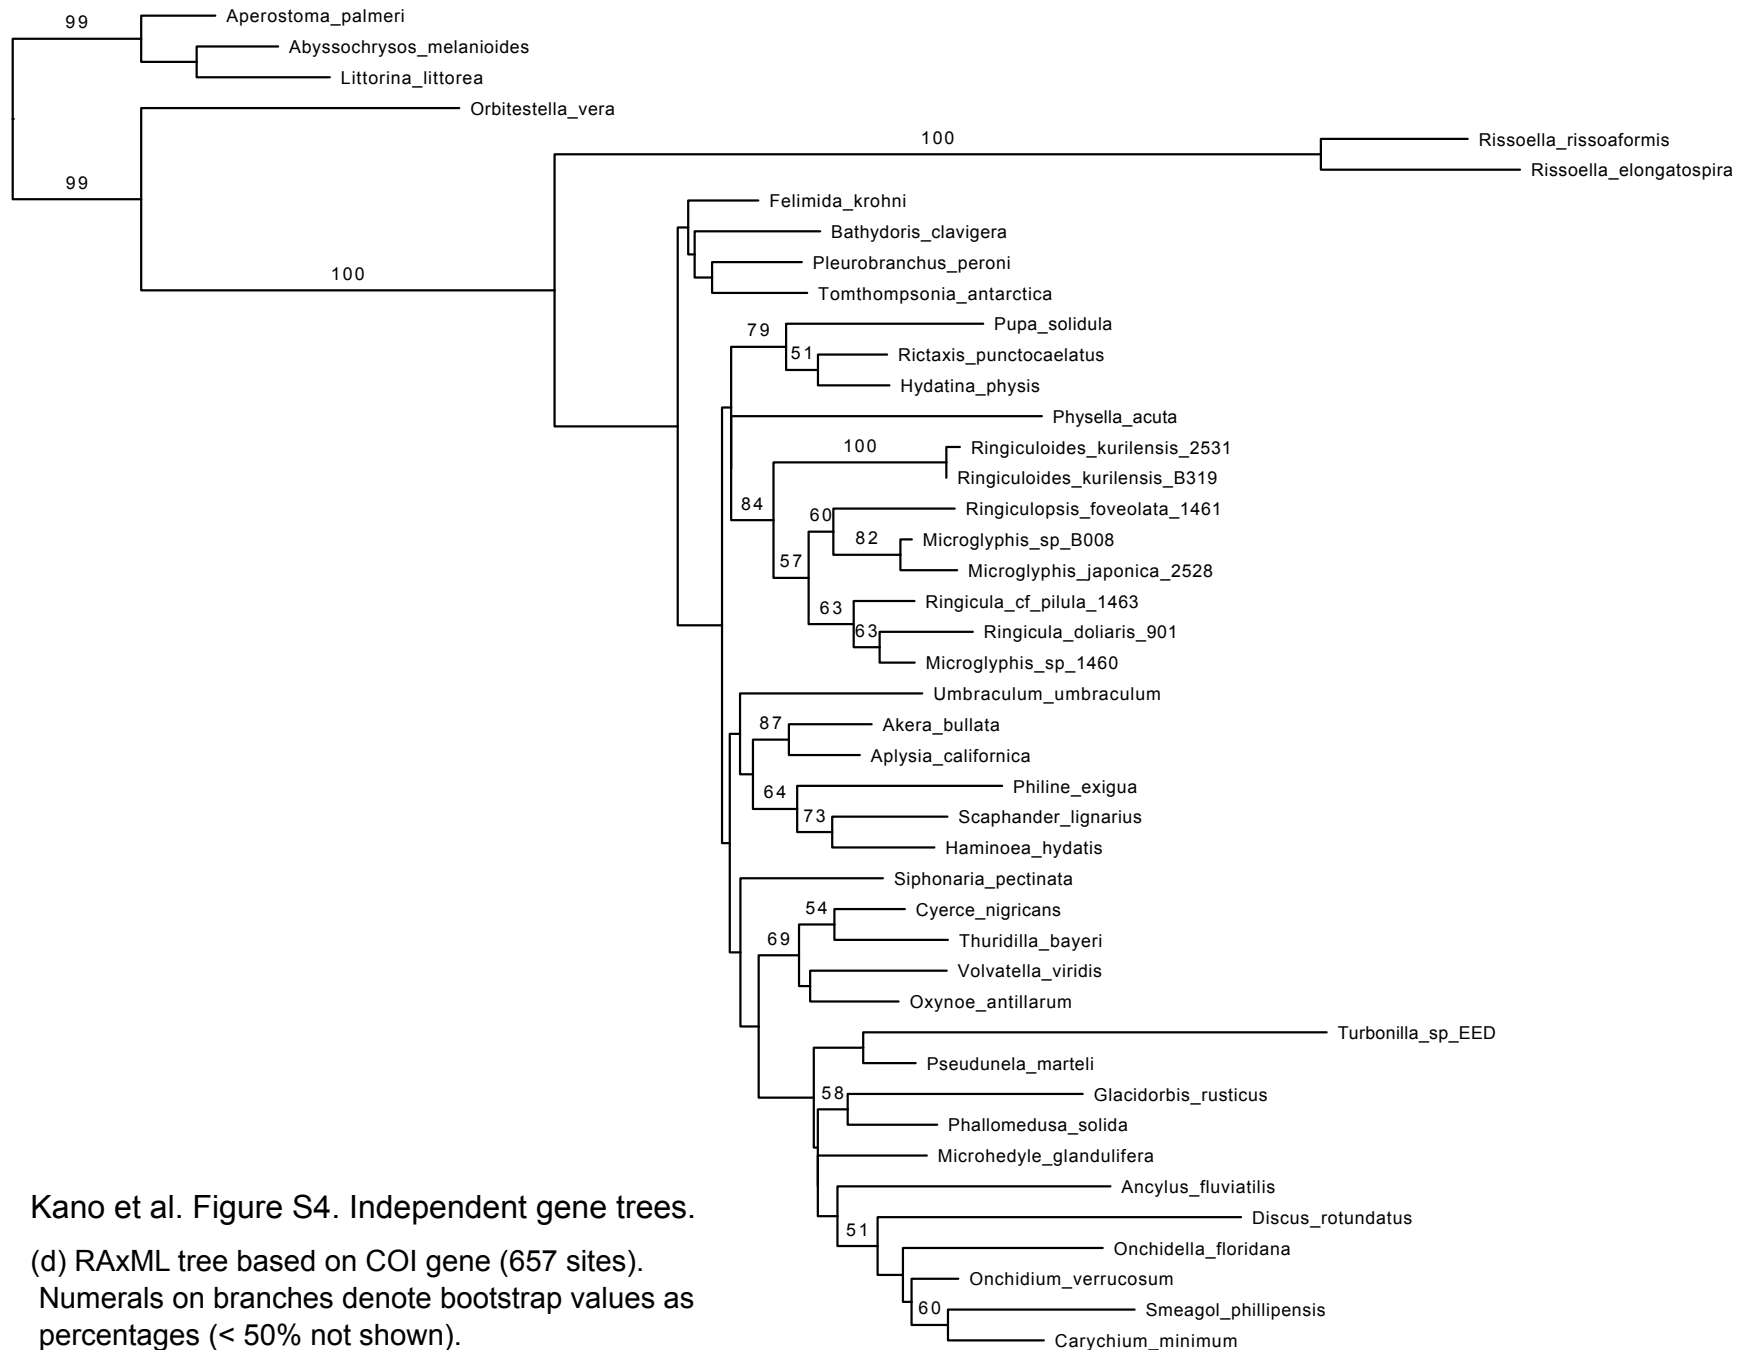

Kano et al. Figure S4. Independent gene trees.

(d) RAxML tree based on COI gene (657 sites).  
 Numerals on branches denote bootstrap values as percentages (< 50% not shown).

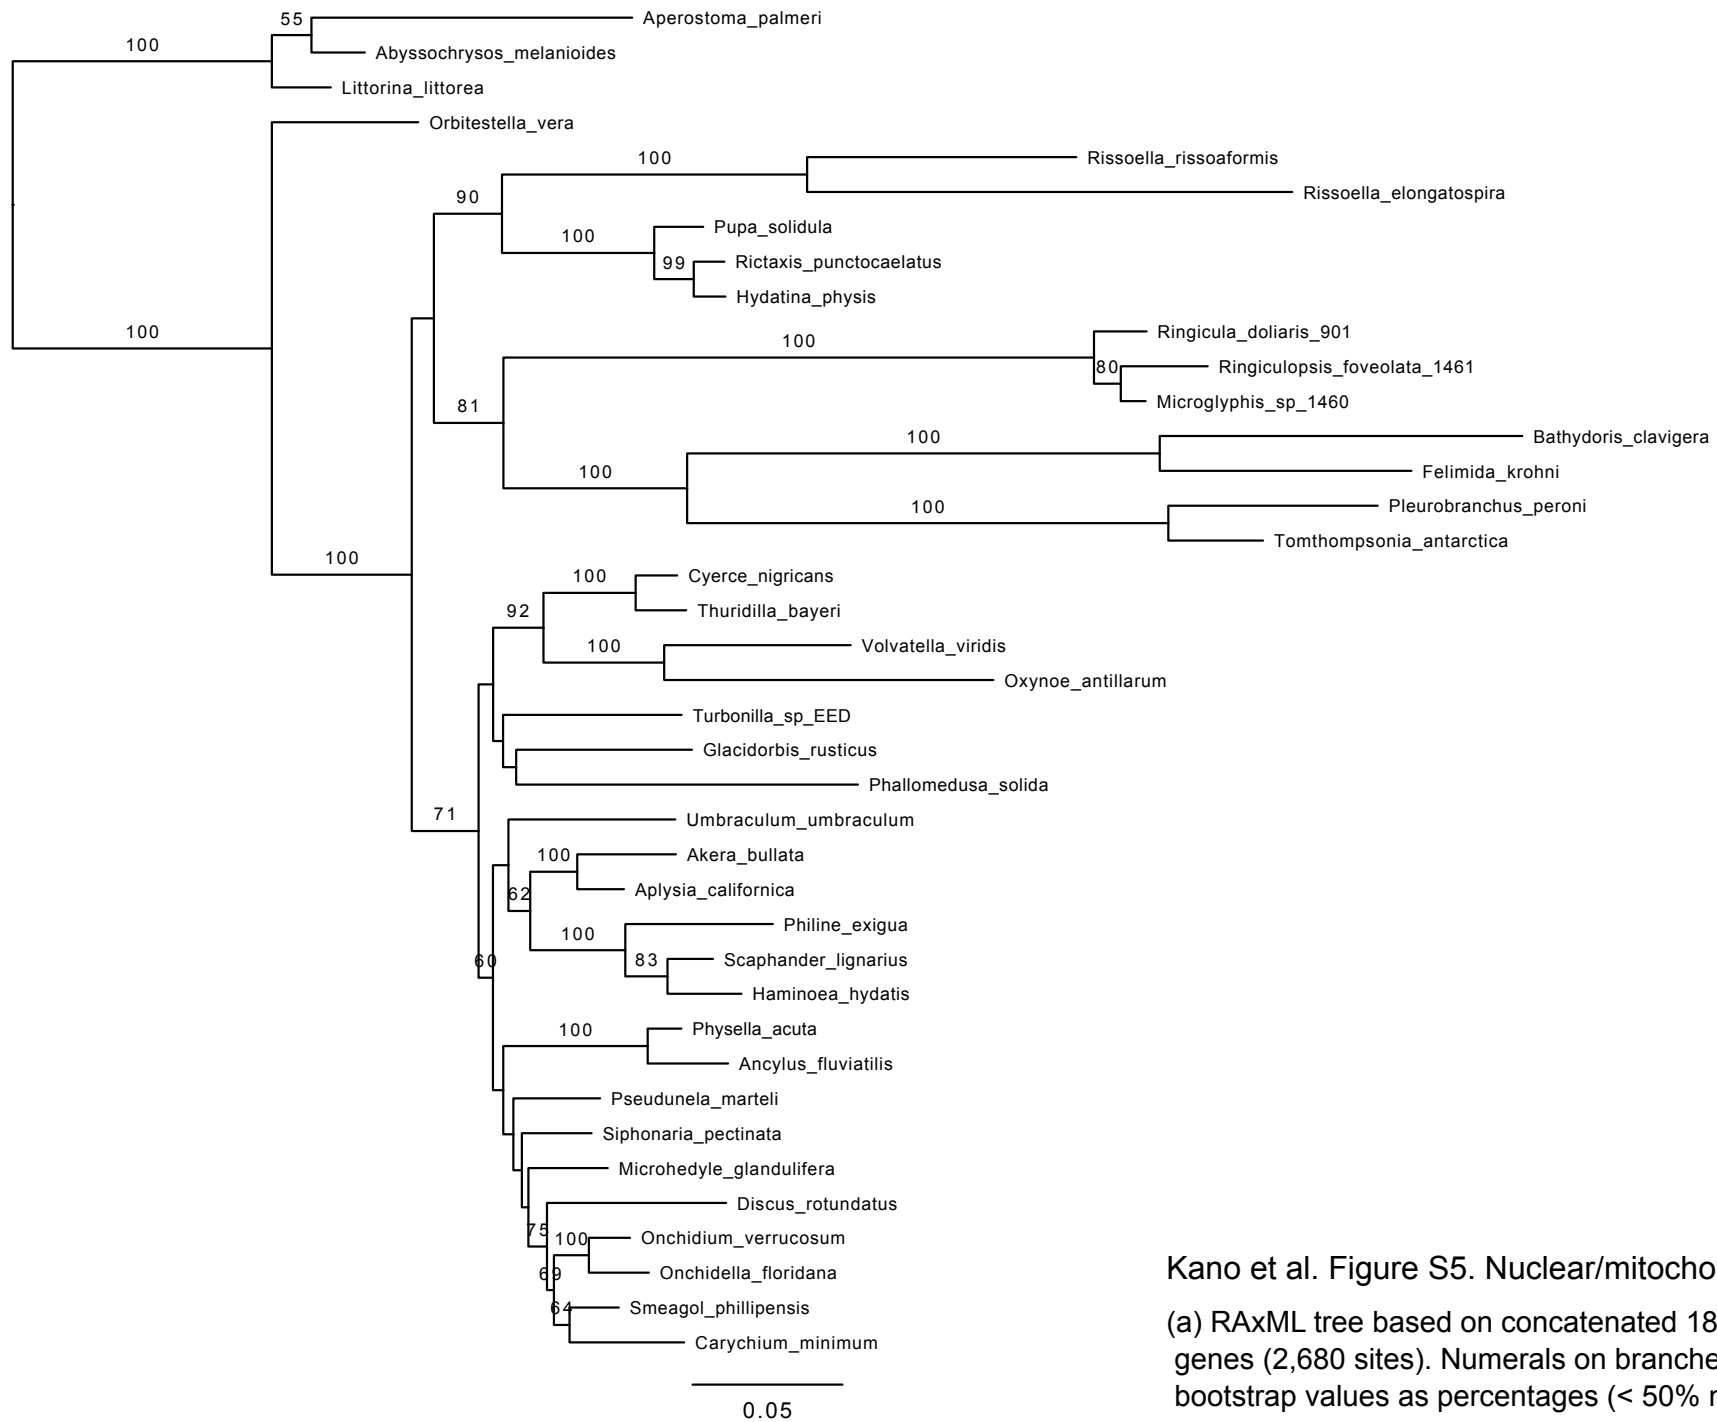

Kano et al. Figure S5. Nuclear/mitochondrial trees.

(a) RAxML tree based on concatenated 18S and 28S genes (2,680 sites). Numerals on branches denote bootstrap values as percentages (< 50% not shown).



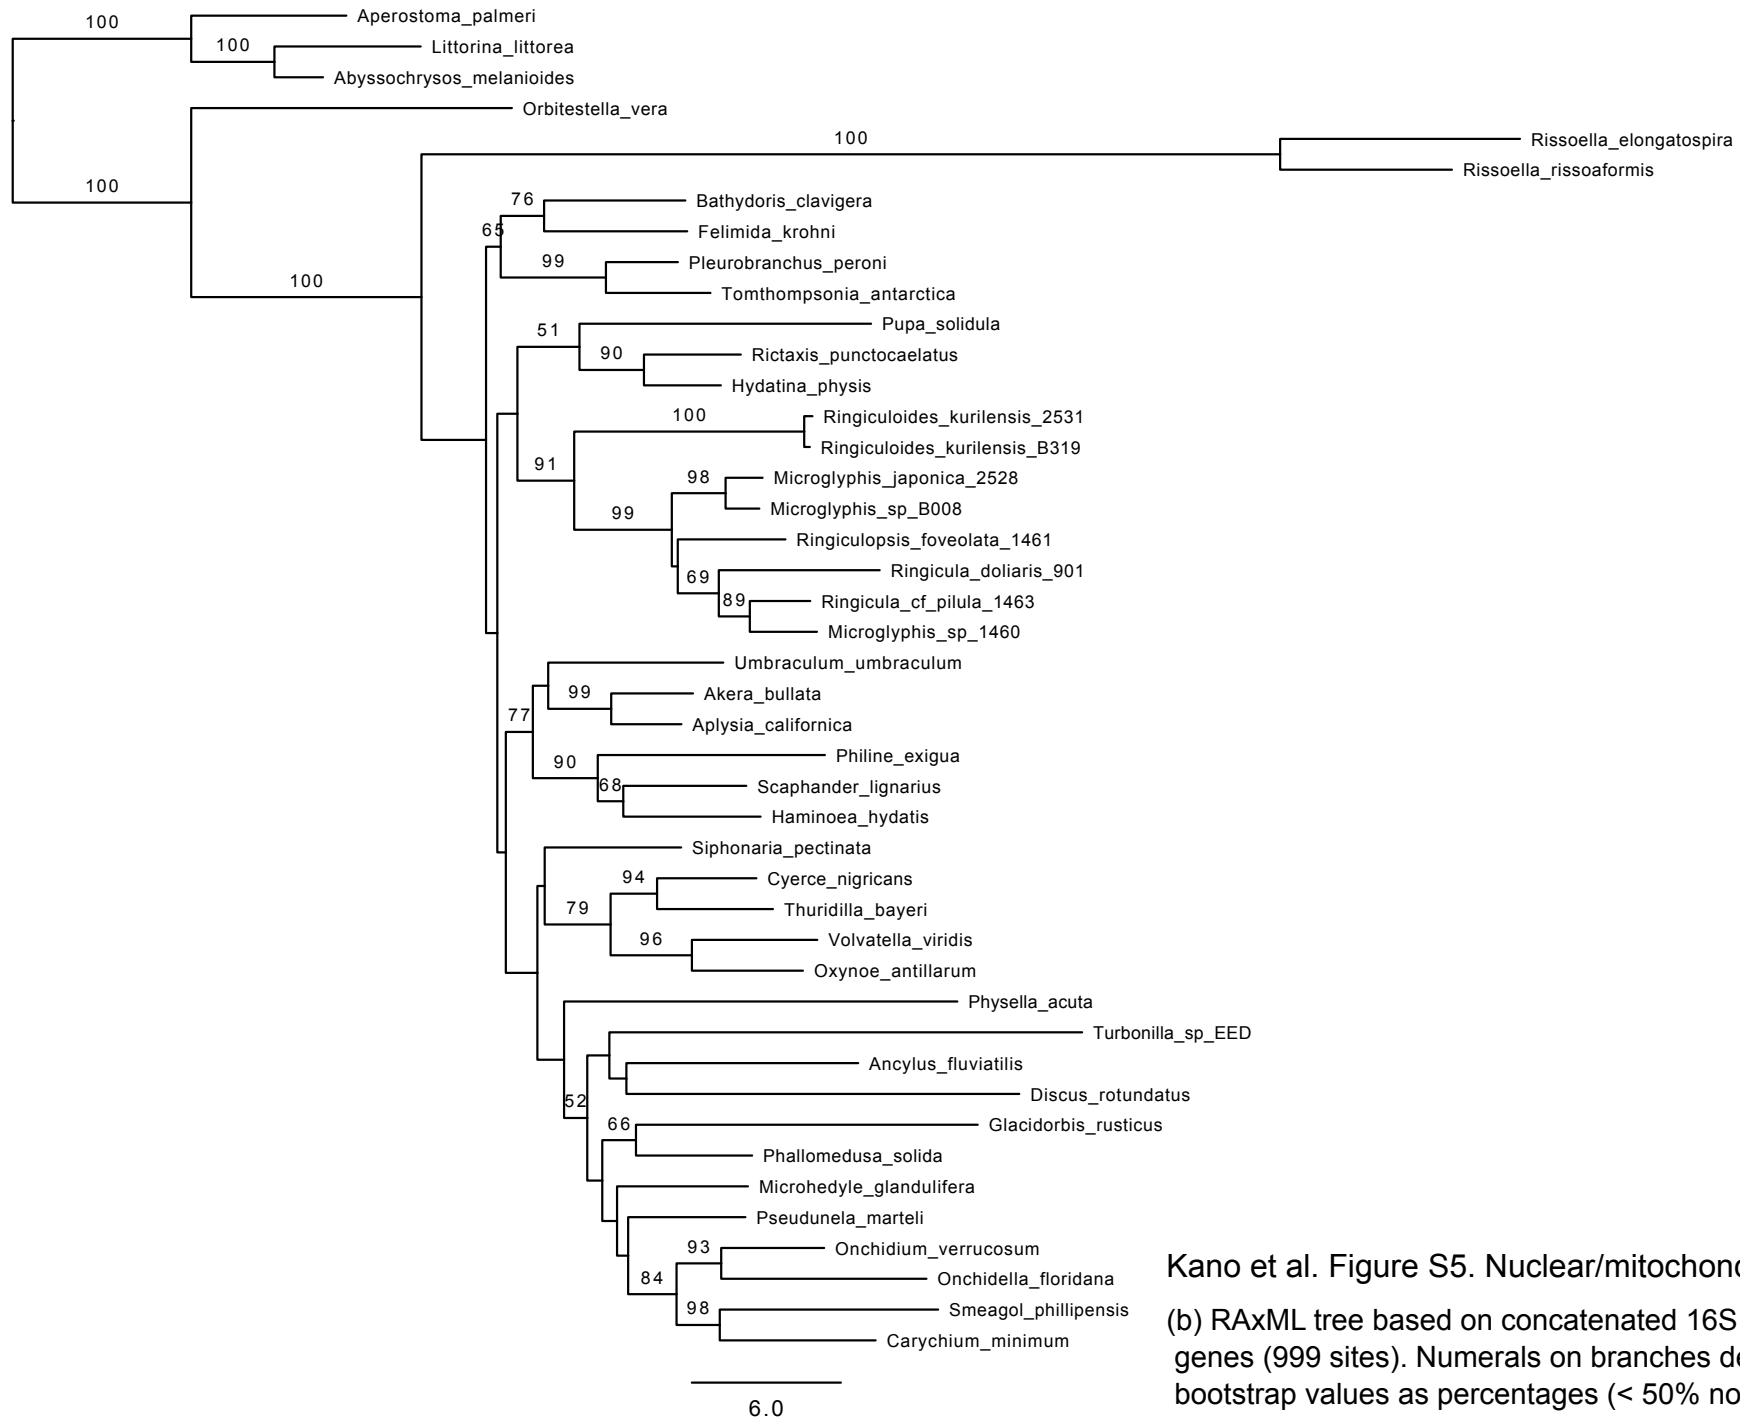

Kano et al. Figure S5. Nuclear/mitochondrial trees.  
 (b) RAxML tree based on concatenated 16S and COI genes (999 sites). Numerals on branches denote bootstrap values as percentages (< 50% not shown).
